# Supplementary material for: Cannabinoid Hyperemesis Syndrome Survey and Genomic Investigation
Source: PubMed Central journal article supplement — Cannabis Cannabinoid Res. 2022 Jun 6;7(3):336–44. doi: 10.1089/can.2021.0046 (PMC9225400; doi:10.1089/can.2021.0046), 2022-06-06
Supplement: Supp_App1.pdf [file Supp_App1.pdf]

This report is filtered

Only show: #10 Question "Have you used cannabis ("marijuana") within the last year?" is one of the following answers ("Yes") and #30 Question "Do you suffer from periodic severe nausea and vomiting?" is one of the following answers ("Yes") and #37 Question "Do you suffer from periodic severe abdominal pain?" is one of the following answers ("Yes") and #44 Question "If you have suffered severe nausea, vomiting or abdominal pain, was the condition improved by taking hot baths or showers?" is one of the following answers ("Yes") and #45 Question "Have you ever been diagnosed as having the cannabinoid hyperemesis syndrome?" is one of the following answers ("Yes")

# Report for Studysurvey

## 1. Gender:

Filter: #10 Question "Have you used cannabis ("marijuana") within the last year?" is one of the following answers ("Yes")

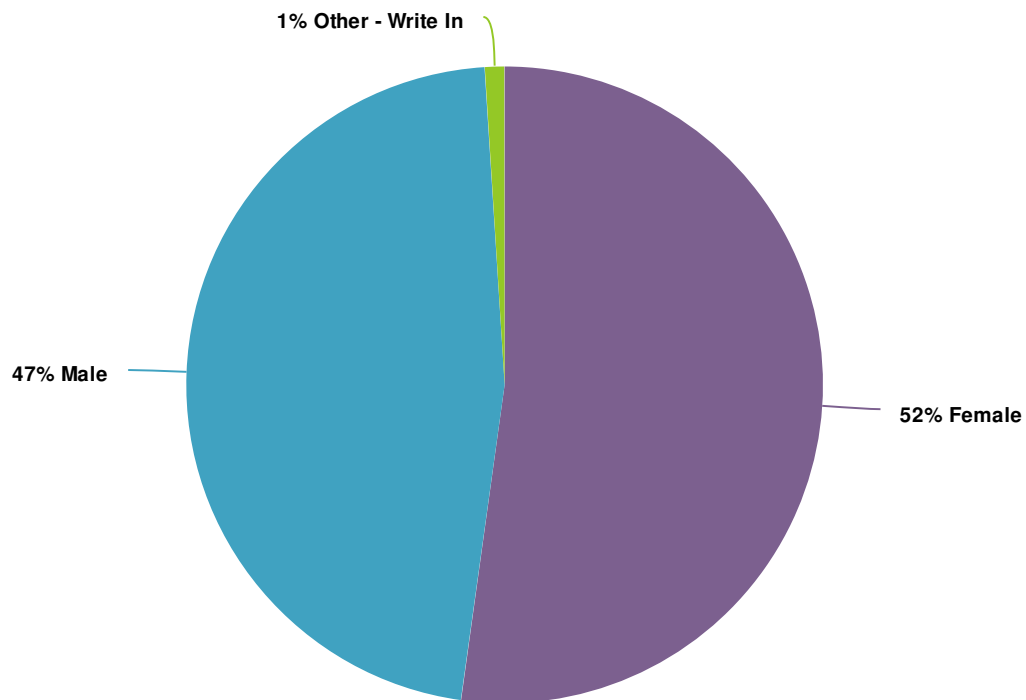

| Value            |                                                                                   | Percent | Responses |
|------------------|-----------------------------------------------------------------------------------|---------|-----------|
| Female           |  | 52.2%   | 107       |
| Male             |  | 46.8%   | 96        |
| Other - Write In |  | 1.0%    | 2         |

**Totals: 205**

## 2. Please check any medications you are currently using or were taking recently: 2C19 Inhibitors

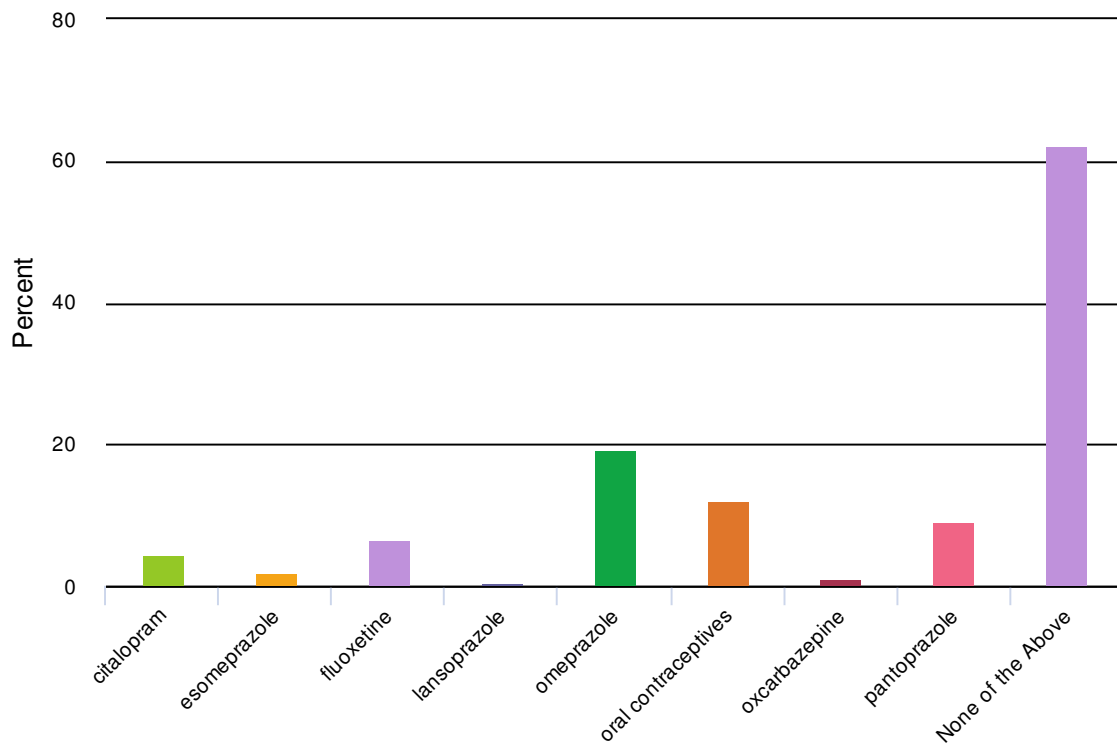

| Value               | Percent | Responses |
|---------------------|---------|-----------|
| citalopram          | 4.5%    | 9         |
| esomeprazole        | 2.0%    | 4         |
| fluoxetine          | 6.6%    | 13        |
| lansoprazole        | 0.5%    | 1         |
| omeprazole          | 19.2%   | 38        |
| oral contraceptives | 12.1%   | 24        |
| oxcarbazepine       | 1.0%    | 2         |
| pantoprazole        | 9.1%    | 18        |
| None of the Above   | 62.1%   | 123       |

### 3. Please check any medications you are currently using or were taking recently: 3A457 Inhibitors

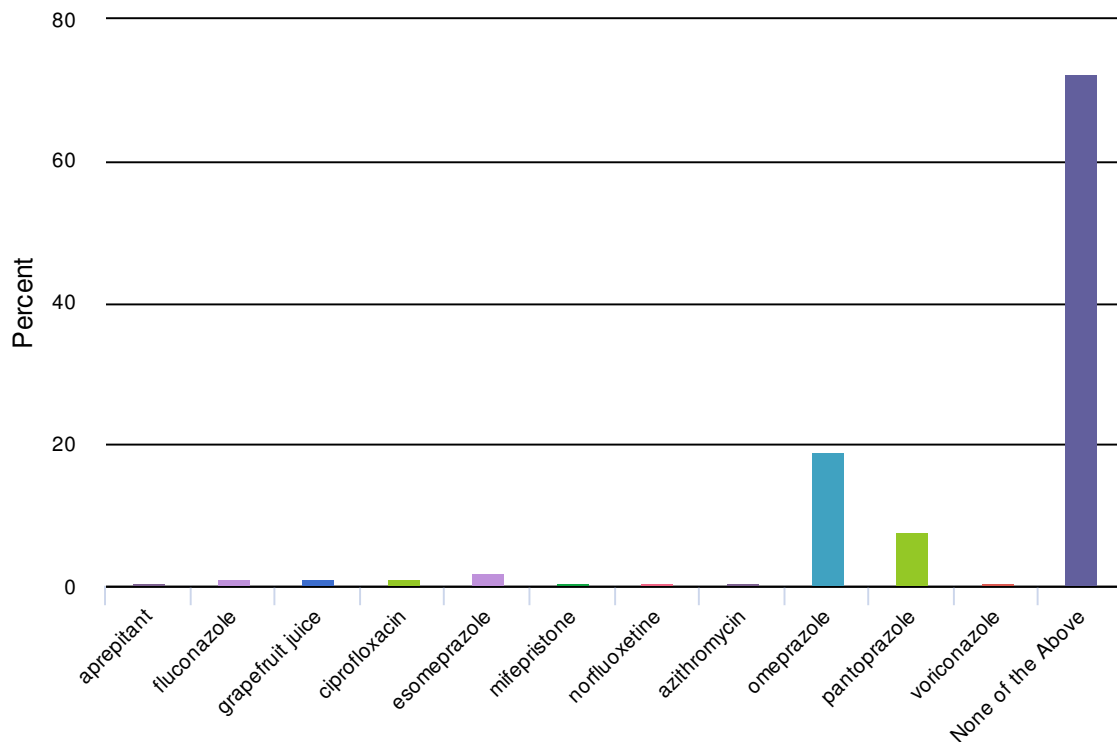

| Value             | Percent | Responses |
|-------------------|---------|-----------|
| omeprazole        | 19.0%   | 39        |
| pantoprazole      | 7.8%    | 16        |
| None of the Above | 72.2%   | 148       |
| aprepitant        | 0.5%    | 1         |
| fluconazole       | 1.0%    | 2         |
| grapefruit juice  | 1.0%    | 2         |
| ciprofloxacin     | 1.0%    | 2         |
| esomeprazole      | 2.0%    | 4         |
| mifepristone      | 0.5%    | 1         |
| norfluoxetine     | 0.5%    | 1         |
| azithromycin      | 0.5%    | 1         |
| voriconazole      | 0.5%    | 1         |



4. Have you used cannabis (“marijuana”) within the last year?

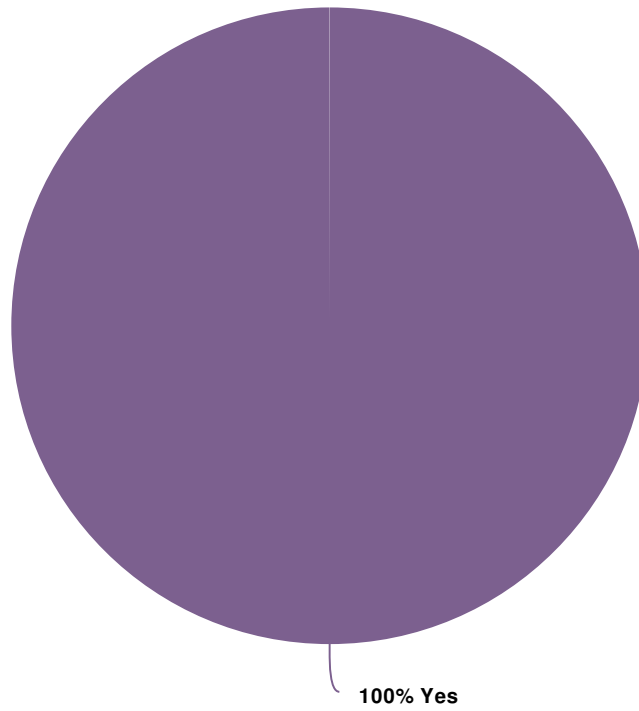

| Value |                                                                                     | Percent | Responses          |
|-------|-------------------------------------------------------------------------------------|---------|--------------------|
| Yes   |  | 100.0%  | 205                |
|       |                                                                                     |         | <b>Totals: 205</b> |

## 5. If yes, how often?

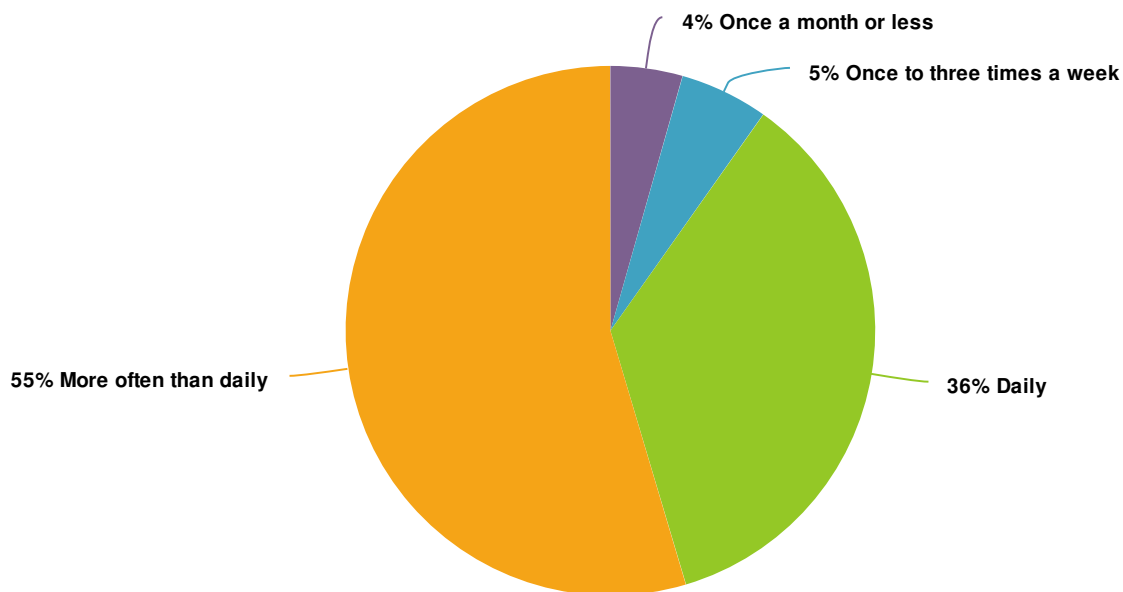

| Value                      | Percent | Responses |
|----------------------------|---------|-----------|
| Once a month or less       | 4.4%    | 9         |
| Once to three times a week | 5.4%    | 11        |
| Daily                      | 35.6%   | 73        |
| More often than daily      | 54.6%   | 112       |

Totals: 205

## 6. How do you use cannabis (check as many as apply to you)?

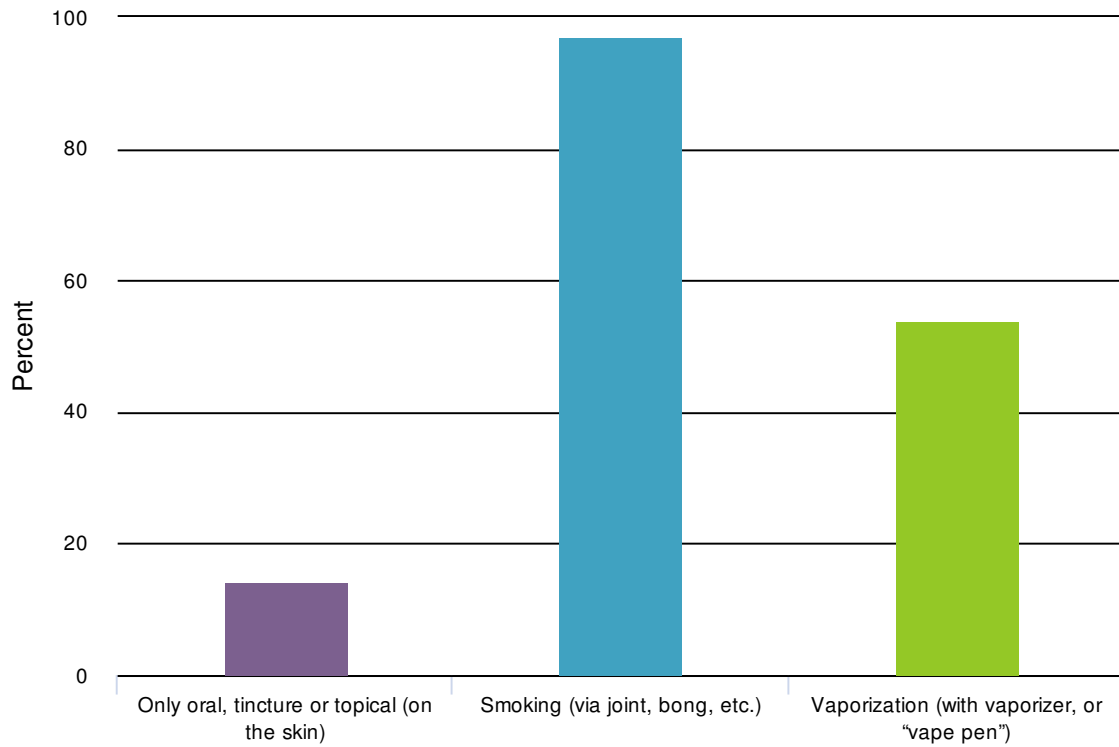

| Value                                        |                                                                                     | Percent | Responses |
|----------------------------------------------|-------------------------------------------------------------------------------------|---------|-----------|
| Only oral, tincture or topical (on the skin) |  | 14.1%   | 29        |
| Smoking (via joint, bong, etc.)              |  | 97.1%   | 199       |
| Vaporization (with vaporizer, or "vape pen") |  | 53.7%   | 110       |



### 7. For smoking or vaporization, do you use?:

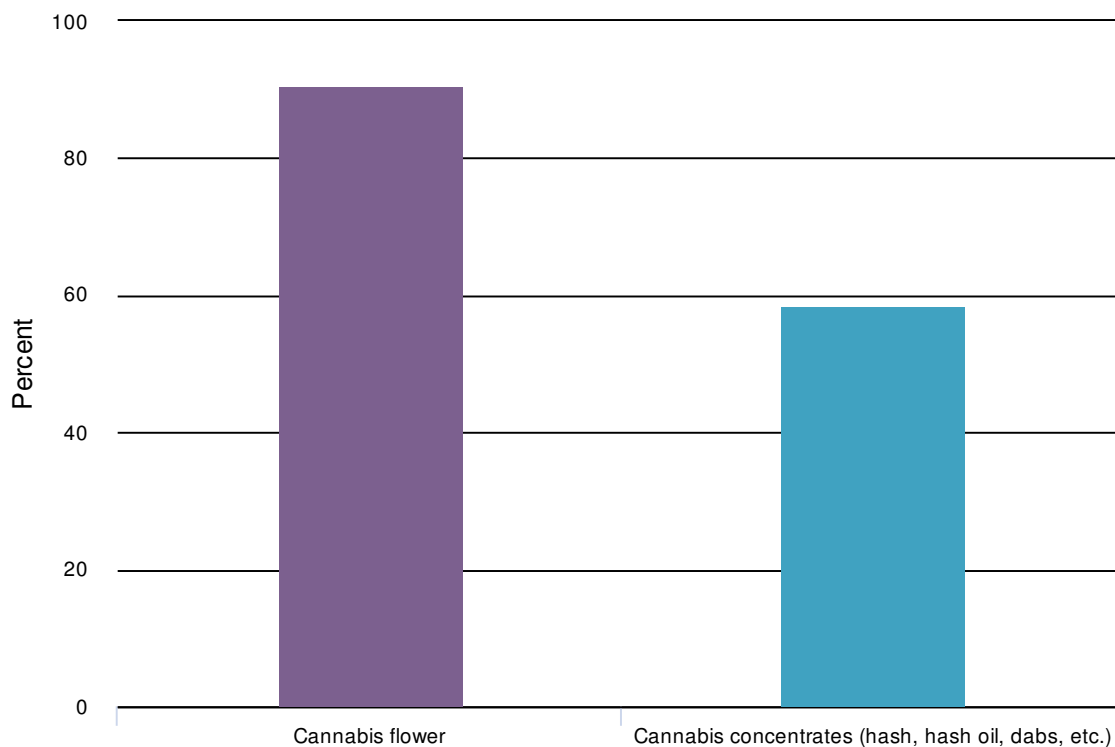

| Value                                              |                                                                                      | Percent | Responses |
|----------------------------------------------------|--------------------------------------------------------------------------------------|---------|-----------|
| Cannabis flower                                    |  | 90.7%   | 186       |
| Cannabis concentrates (hash, hash oil, dabs, etc.) |  | 58.5%   | 120       |

### 8. How many grams of cannabis flower do you use per day?

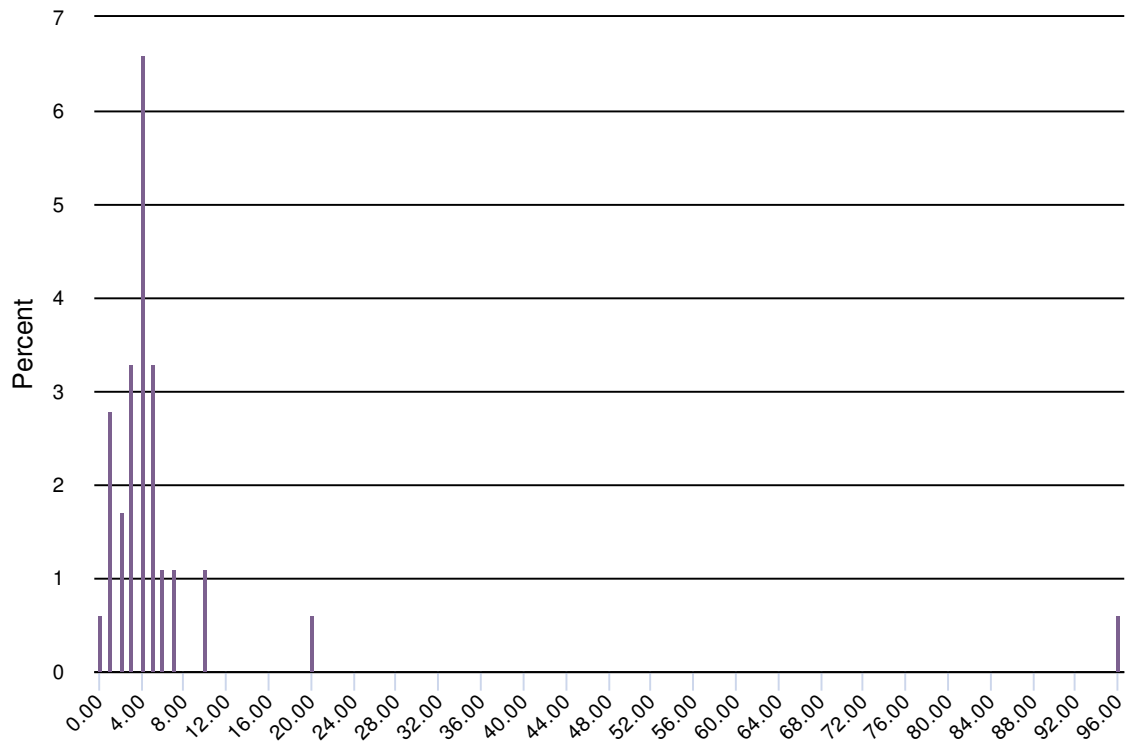

9. How many inhalations of cannabis concentrates do you take per day?

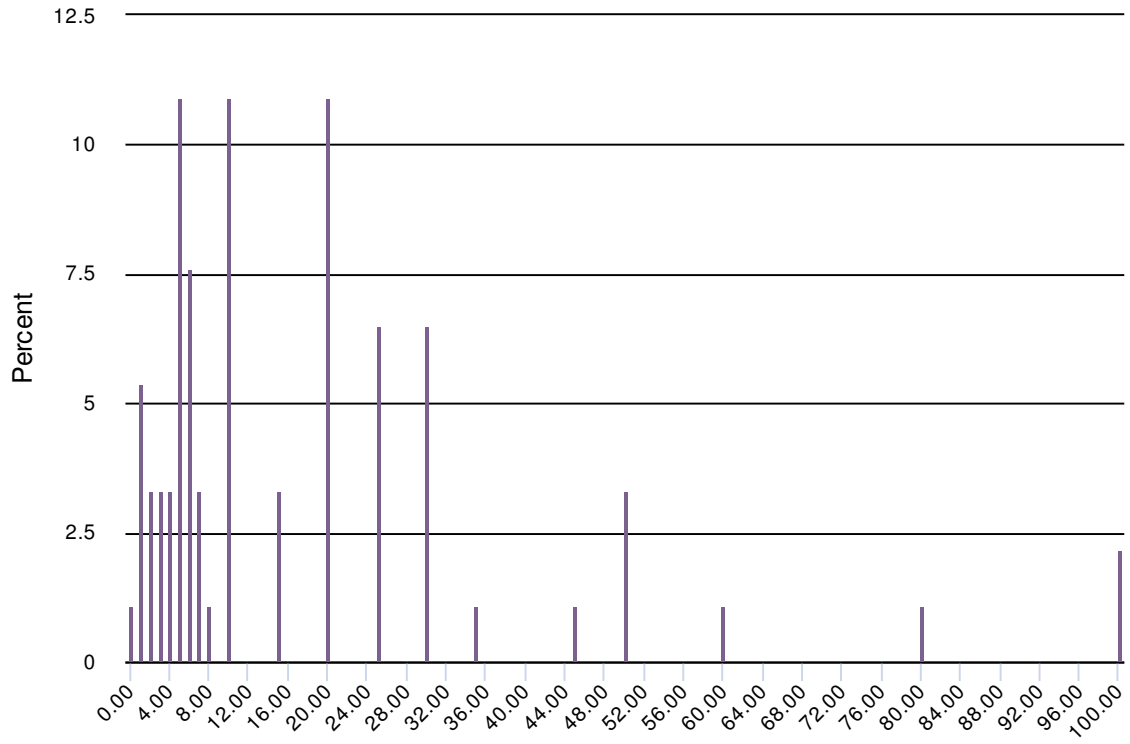

10. Do you know the composition of the cannabis that you use most often?

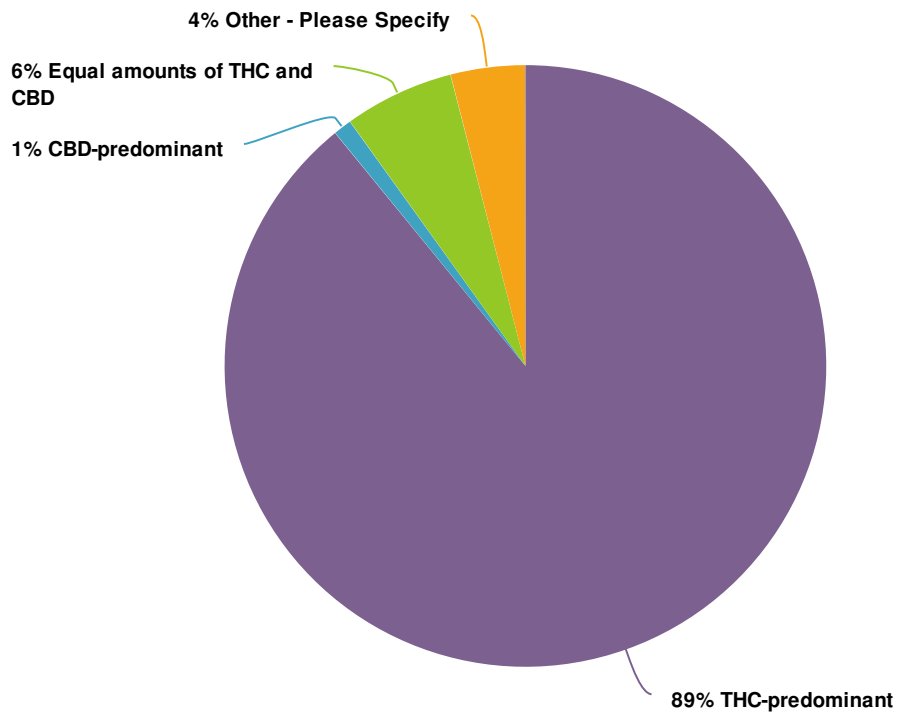

| Value                        | Percent | Responses |
|------------------------------|---------|-----------|
| THC-predominant              | 89.1%   | 180       |
| CBD-predominant              | 1.0%    | 2         |
| Equal amounts of THC and CBD | 5.9%    | 12        |
| Other - Please Specify       | 4.0%    | 8         |

Totals: 202

### 11. Is your use of cannabis:

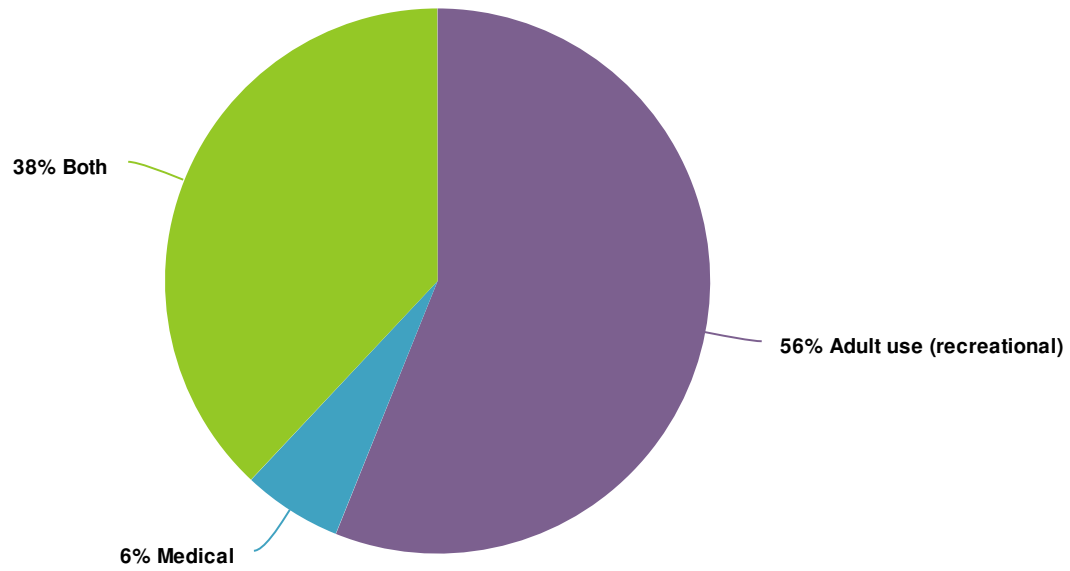

| Value                    |                                                                                     | Percent | Responses |
|--------------------------|-------------------------------------------------------------------------------------|---------|-----------|
| Adult use (recreational) |  | 56.1%   | 115       |
| Medical                  |  | 5.9%    | 12        |
| Both                     |  | 38.0%   | 78        |

Totals: 205

12. If your use is medical, for what condition(s) (check all that apply):

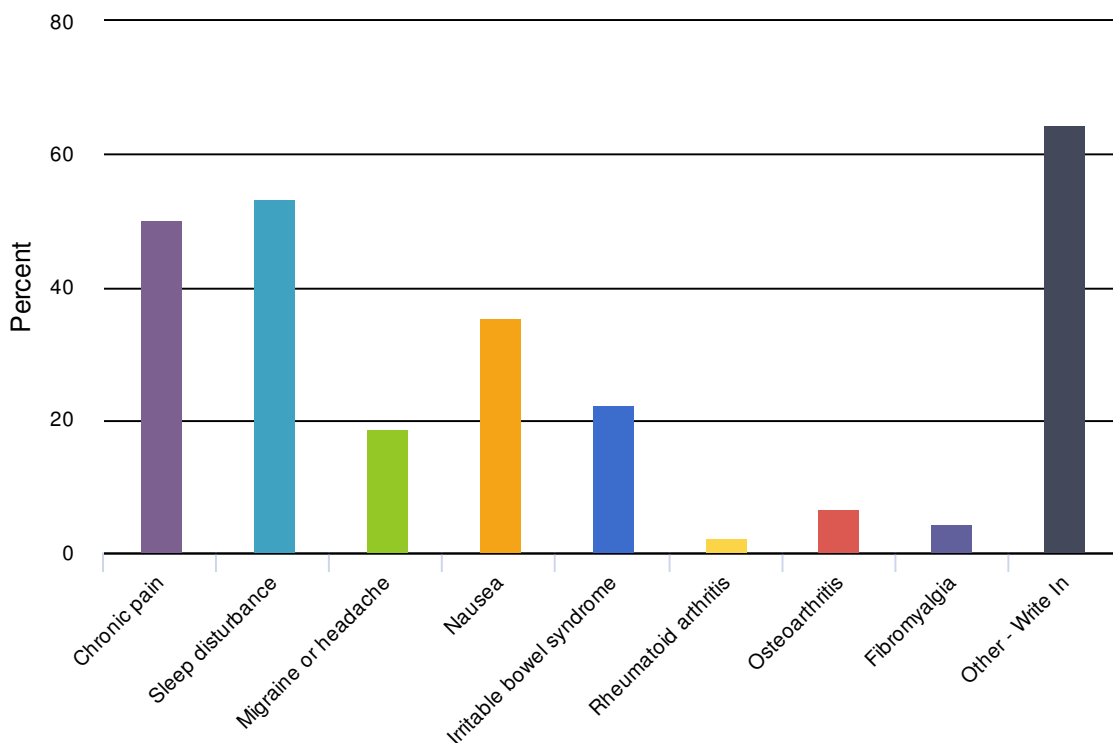

| Value                    | Percent | Responses |
|--------------------------|---------|-----------|
| Chronic pain             | 50.0%   | 45        |
| Sleep disturbance        | 53.3%   | 48        |
| Migraine or headache     | 18.9%   | 17        |
| Nausea                   | 35.6%   | 32        |
| Irritable bowel syndrome | 22.2%   | 20        |
| Rheumatoid arthritis     | 2.2%    | 2         |
| Osteoarthritis           | 6.7%    | 6         |
| Fibromyalgia             | 4.4%    | 4         |
| Other - Write In         | 64.4%   | 58        |

13. Have you ever been diagnosed or treated for cannabis dependency or addiction?

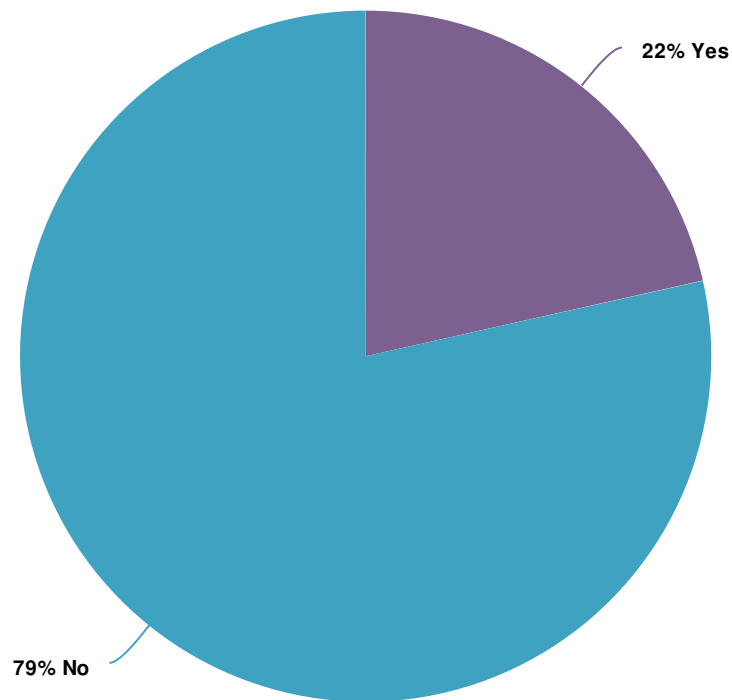

| Value |  | Percent | Responses |
|-------|--|---------|-----------|
| Yes   |  | 21.5%   | 44        |
| No    |  | 78.5%   | 161       |

Totals: 205

14. Have you ever been told that you should stop cannabis use for health reasons?

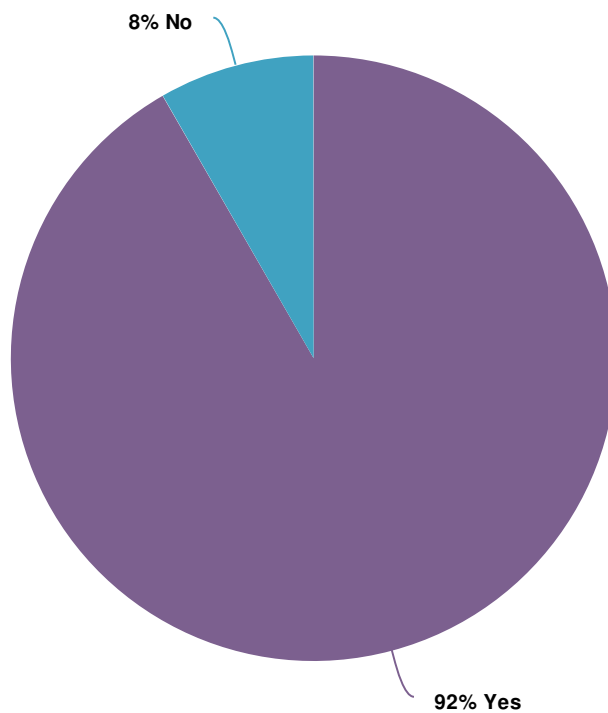

| Value |                                                                                     | Percent | Responses |
|-------|-------------------------------------------------------------------------------------|---------|-----------|
| Yes   |  | 91.7%   | 188       |
| No    |  | 8.3%    | 17        |

Totals: 205



15. Have you ever had withdrawal symptoms after stopping cannabis usage?

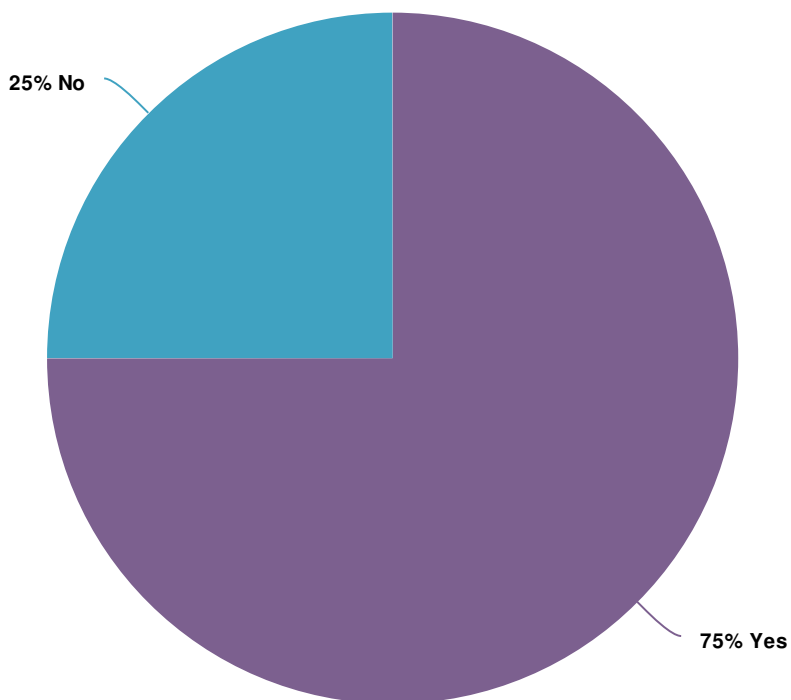

| Value |                                                                                     | Percent | Responses |
|-------|-------------------------------------------------------------------------------------|---------|-----------|
| Yes   |  | 75.0%   | 153       |
| No    |  | 25.0%   | 51        |

Totals: 204

16. If yes, you have had withdrawal symptoms, what were they?  
 (Check all that apply):

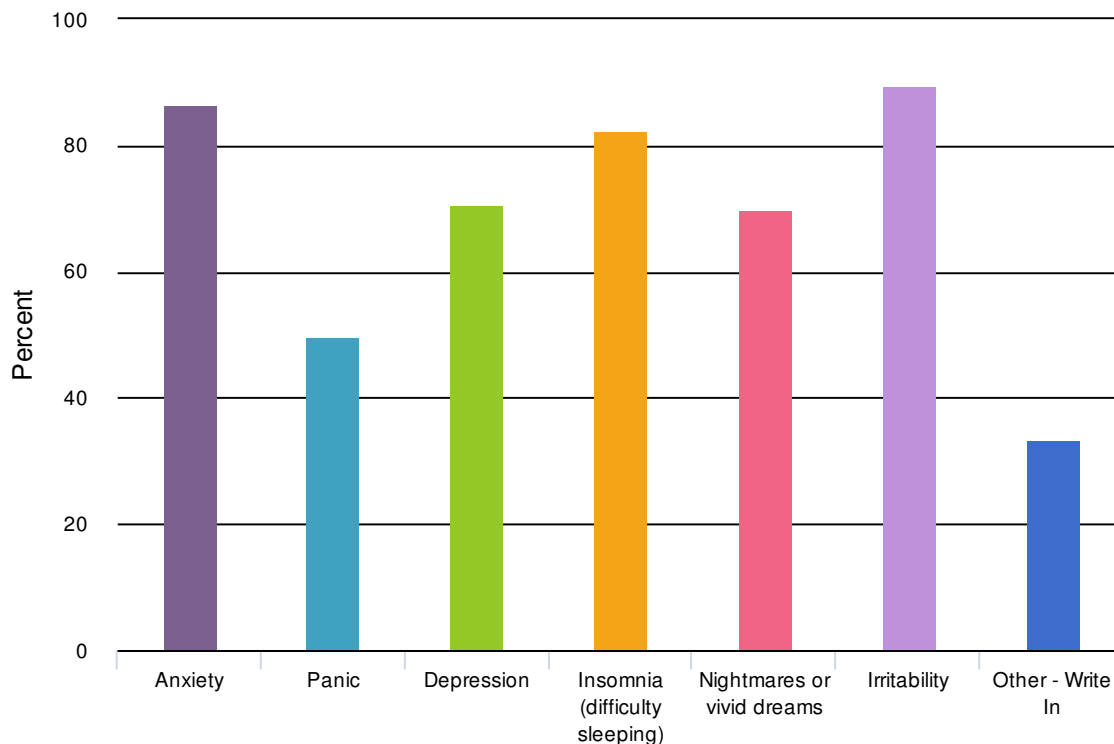

| Value                          | Percent | Responses |
|--------------------------------|---------|-----------|
| Anxiety                        | 86.3%   | 132       |
| Panic                          | 49.7%   | 76        |
| Depression                     | 70.6%   | 108       |
| Insomnia (difficulty sleeping) | 82.4%   | 126       |
| Nightmares or vivid dreams     | 69.9%   | 107       |
| Irritability                   | 89.5%   | 137       |
| Other - Write In               | 33.3%   | 51        |

17. If female, are you currently pregnant?

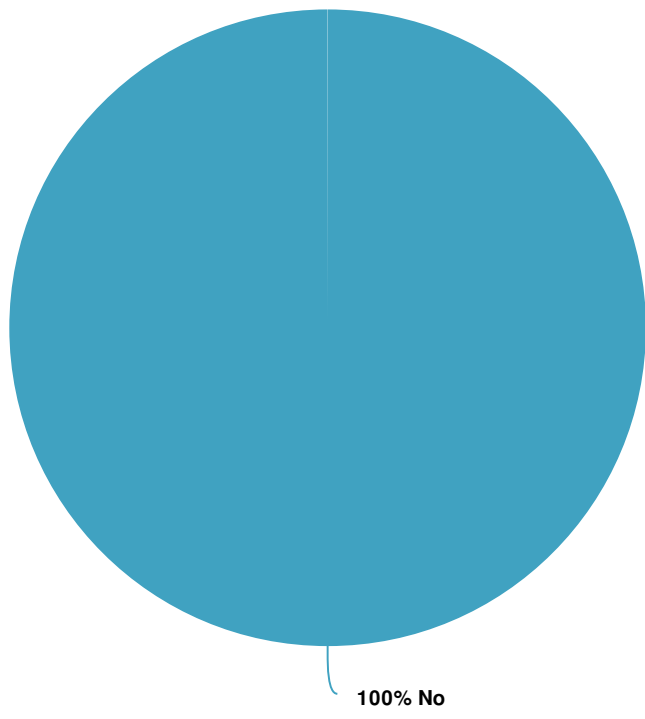

| Value | Percent | Responses          |
|-------|---------|--------------------|
| No    | 100.0%  | 107                |
|       |         | <b>Totals: 107</b> |

18. If female, have you ever had severe morning sickness or hyperemesis gravidarum?

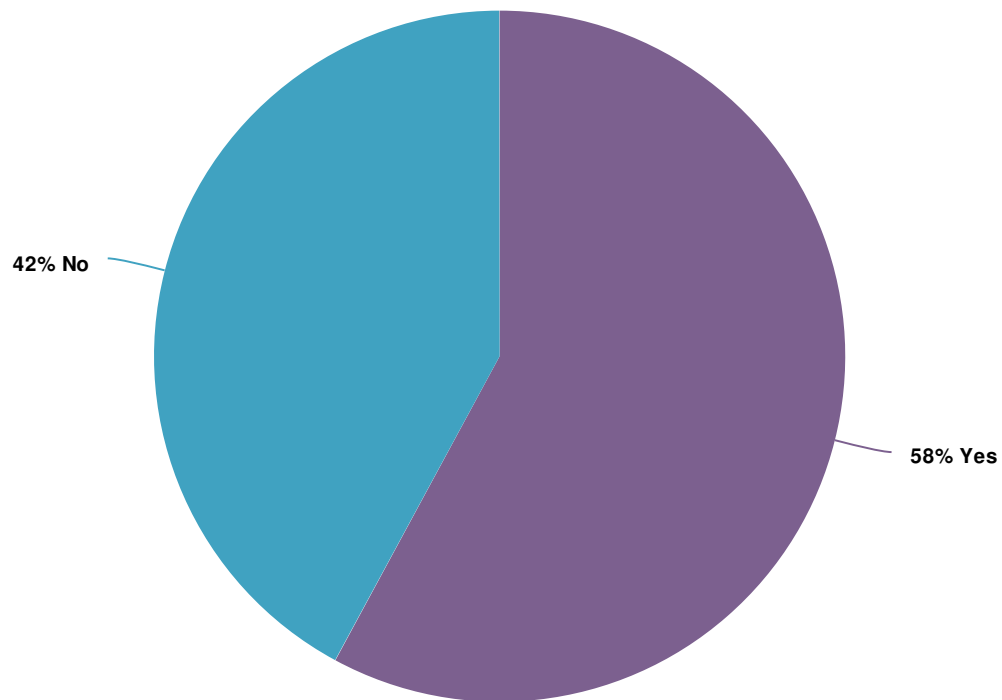

| Value |                                                                                     | Percent | Responses |
|-------|-------------------------------------------------------------------------------------|---------|-----------|
| Yes   |  | 57.9%   | 62        |
| No    |  | 42.1%   | 45        |

Totals: 107

19. Have you ever been diagnosed by a doctor as having “cyclic vomiting syndrome?”

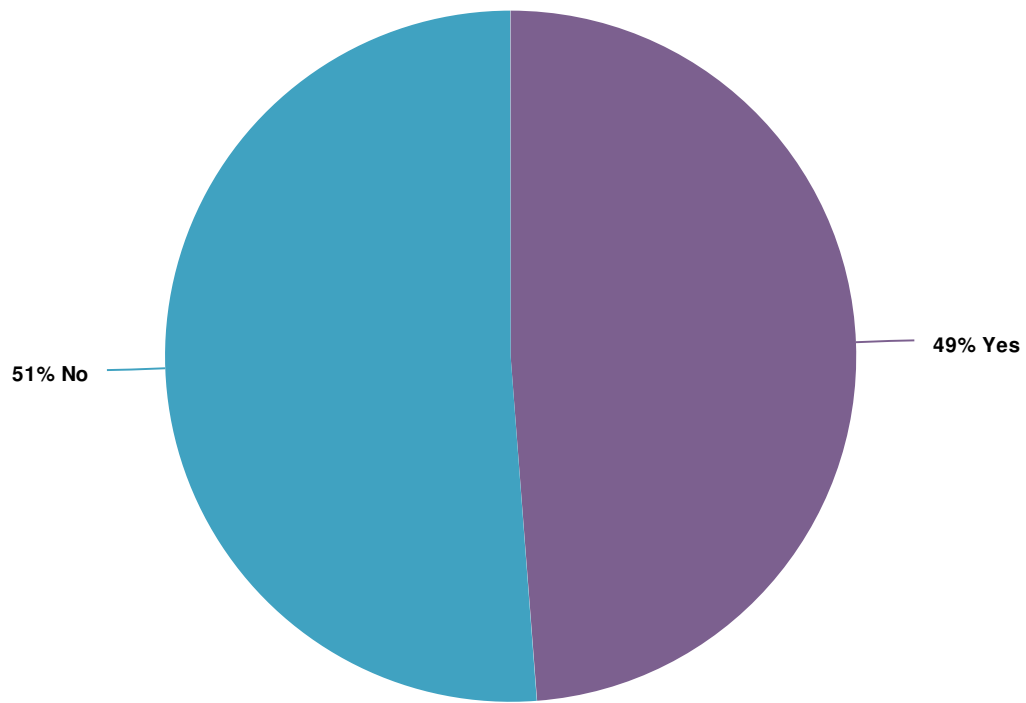

| Value |                                                                                     | Percent | Responses |
|-------|-------------------------------------------------------------------------------------|---------|-----------|
| Yes   |  | 48.8%   | 100       |
| No    |  | 51.2%   | 105       |

Totals: 205

## 20. Do you suffer from migraine headaches?

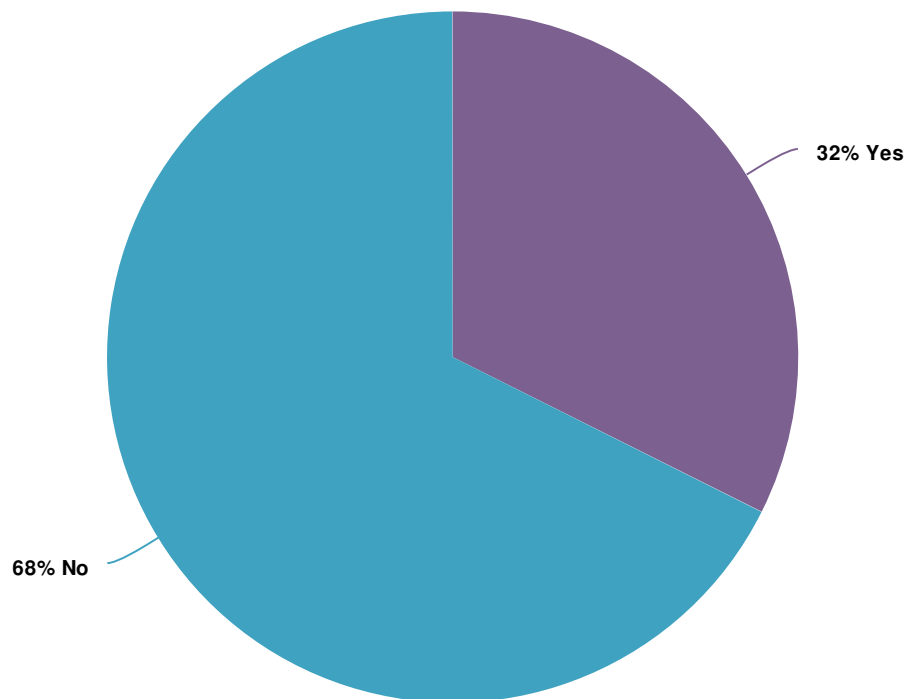

| Value              | Percent | Responses |
|--------------------|---------|-----------|
| Yes                | 32.4%   | 66        |
| No                 | 67.6%   | 138       |
| <b>Totals: 204</b> |         |           |

## 21. Have you ever suffered a head injury?

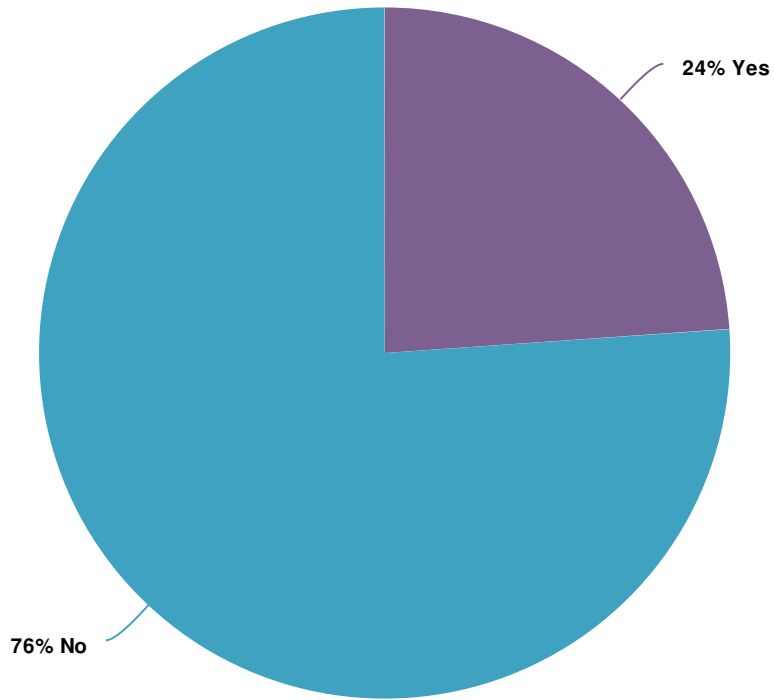

| Value |  | Percent | Responses |
|-------|--|---------|-----------|
| Yes   |  | 23.9%   | 49        |
| No    |  | 76.1%   | 156       |

Totals: 205

22. Have you ever been diagnosed by a doctor as having irritable bowel syndrome?

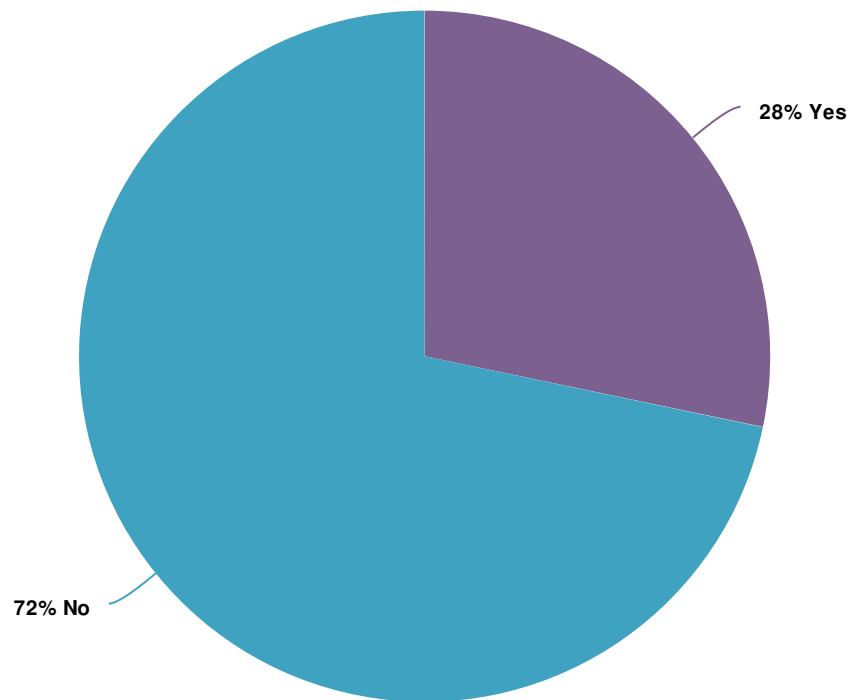

| Value |                                                                                     | Percent | Responses |
|-------|-------------------------------------------------------------------------------------|---------|-----------|
| Yes   |  | 28.3%   | 58        |
| No    |  | 71.7%   | 147       |

Totals: 205



23. Have you ever been diagnosed by a doctor as having gallbladder disease, gallstones or have had your gall bladder removed?

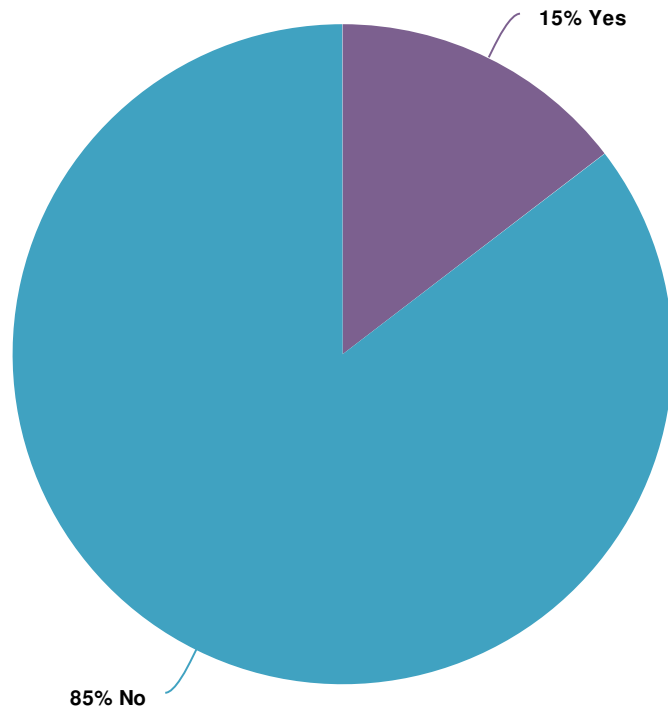

| Value |  | Percent | Responses |
|-------|--|---------|-----------|
| Yes   |  | 14.6%   | 30        |
| No    |  | 85.4%   | 175       |

Totals: 205

24. Do you suffer from periodic severe nausea and vomiting?

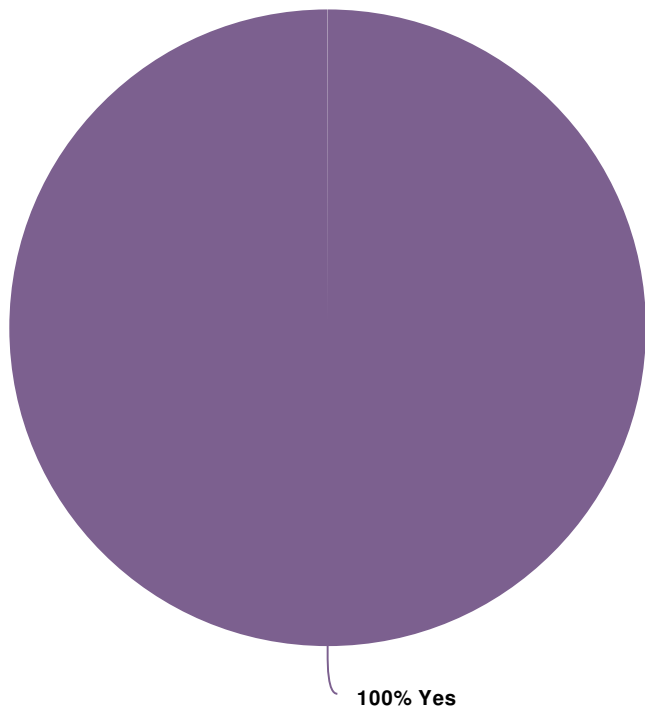

| Value |                                                                                     | Percent | Responses          |
|-------|-------------------------------------------------------------------------------------|---------|--------------------|
| Yes   |  | 100.0%  | 205                |
|       |                                                                                     |         | <b>Totals: 205</b> |



## 26. How often does it occur?

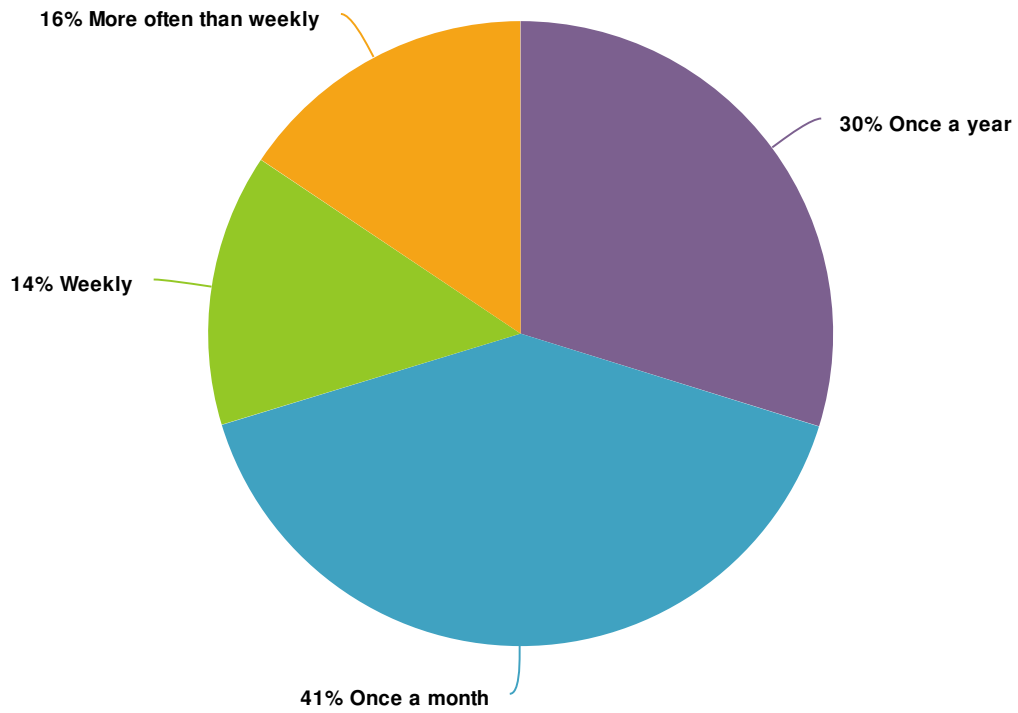

| Value                  |                                                                                     | Percent | Responses |
|------------------------|-------------------------------------------------------------------------------------|---------|-----------|
| Once a year            |  | 29.8%   | 61        |
| Once a month           |  | 40.5%   | 83        |
| Weekly                 |  | 14.1%   | 29        |
| More often than weekly |  | 15.6%   | 32        |

Totals: 205

27. Are your nausea symptoms worse:

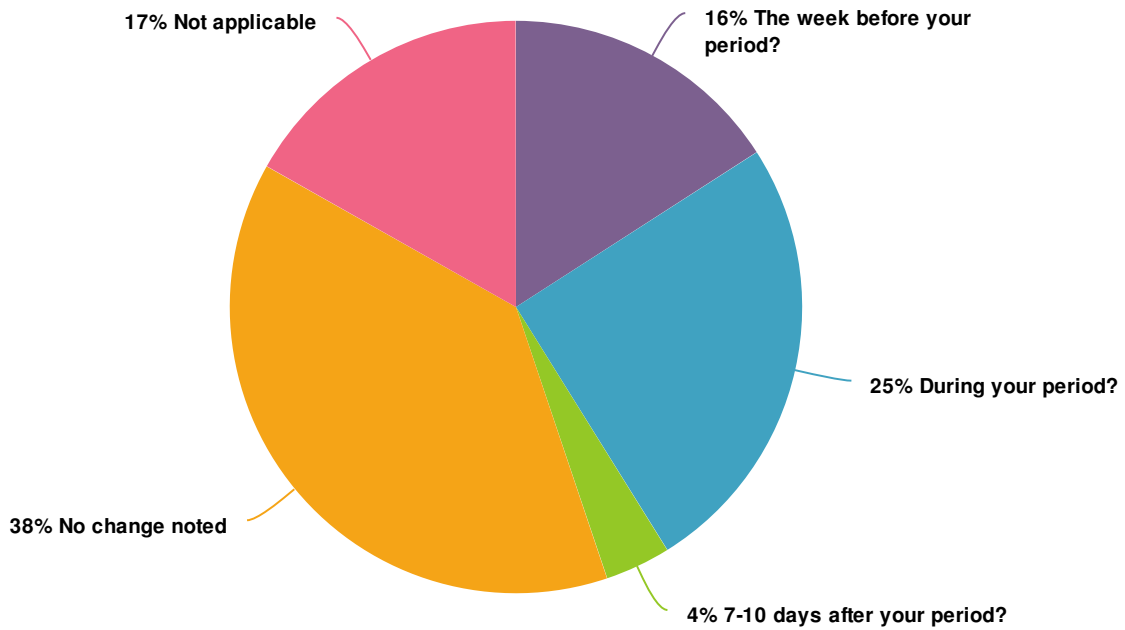

| Value                        | Percent | Responses |
|------------------------------|---------|-----------|
| The week before your period? | 15.9%   | 17        |
| During your period?          | 25.2%   | 27        |
| 7-10 days after your period? | 3.7%    | 4         |
| No change noted              | 38.3%   | 41        |
| Not applicable               | 16.8%   | 18        |

Totals: 107

### 28. Have you been medically evaluated for this?

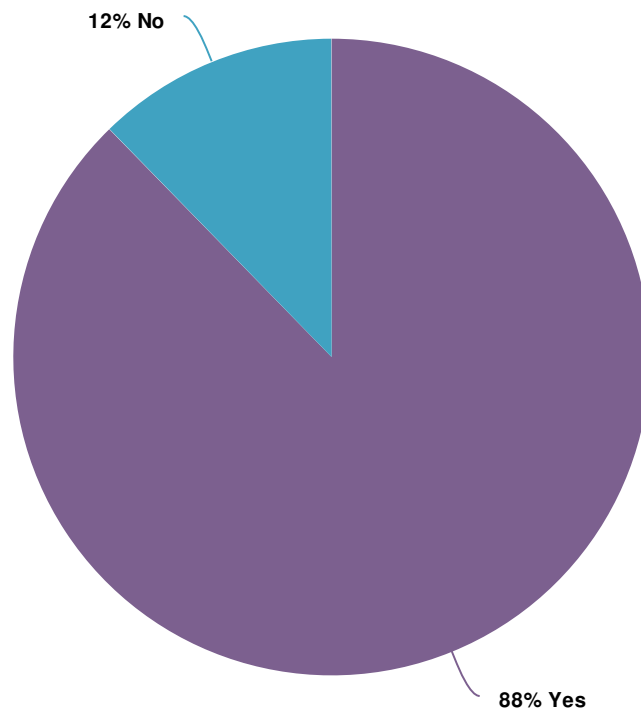

| Value |  | Percent | Responses          |
|-------|--|---------|--------------------|
| Yes   |  | 87.7%   | 93                 |
| No    |  | 12.3%   | 13                 |
|       |  |         | <b>Totals: 106</b> |

29. If so, were you hospitalized for nausea?

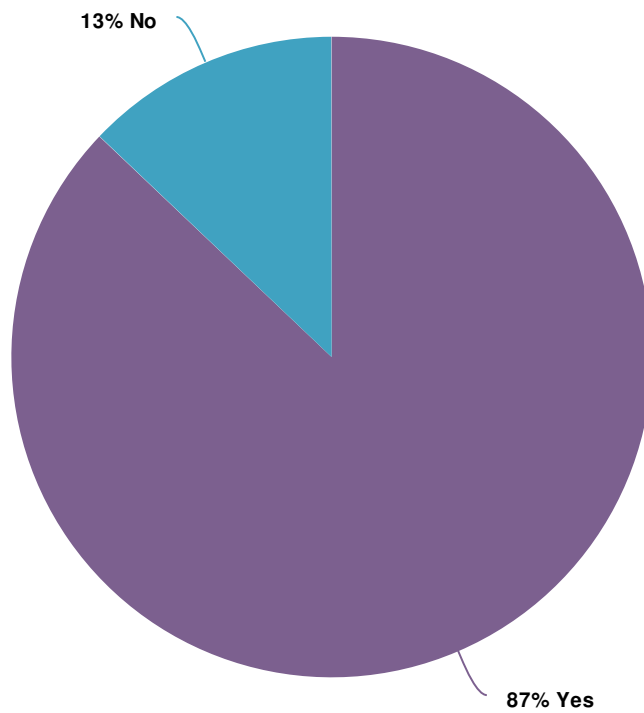

| Value |                                                                                     | Percent | Responses |
|-------|-------------------------------------------------------------------------------------|---------|-----------|
| Yes   |  | 87.1%   | 81        |
| No    |  | 12.9%   | 12        |

Totals: 93

30. What were the results or diagnosis from the evaluation?

A word cloud of medical terms. The most prominent words are 'ch's' in large blue font and 'syndrome' in large green font. Other visible words include 'vomiting', 'cannabis', 'hospital', 'hyperemesis', 'cannabinoid', 'diagnosed', 'stop', 'years', 'nausea', 'doctor', 'test', 'stold', 'er', 'pain', 'blood', 'or', 'symptoms', 'dehydration', 'cvs', 'cyclic', 'endoscopy', 'months', and 'normal'.



31. Do you suffer from periodic severe abdominal pain?

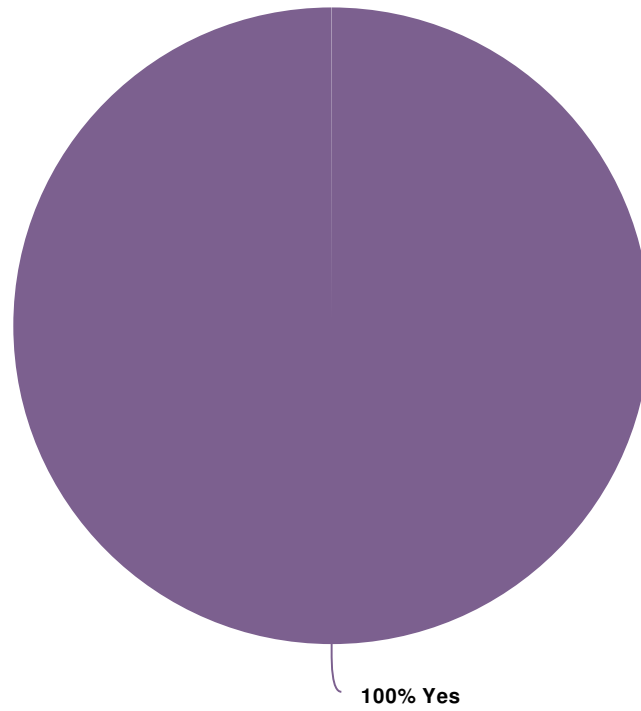

| Value |                                                                                     | Percent | Responses          |
|-------|-------------------------------------------------------------------------------------|---------|--------------------|
| Yes   |  | 100.0%  | 205                |
|       |                                                                                     |         | <b>Totals: 205</b> |

32. For how long?

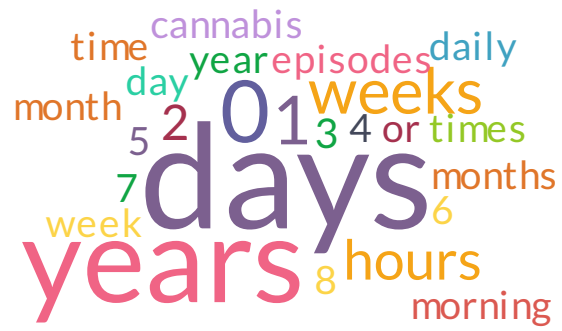

### 33. How often does it occur?

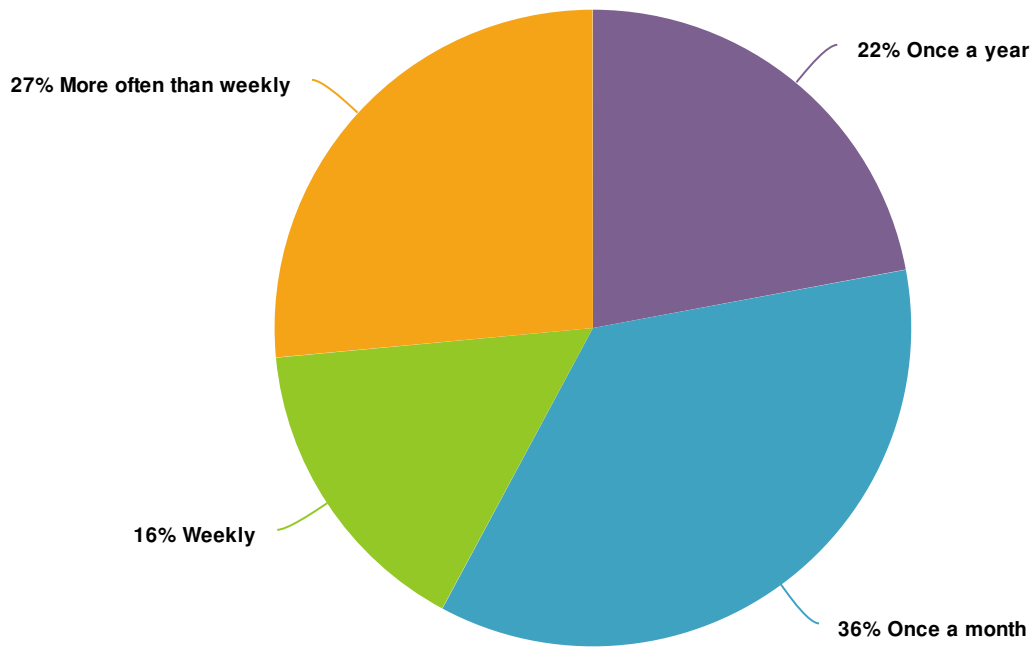

| Value                  |                                                                                     | Percent | Responses |
|------------------------|-------------------------------------------------------------------------------------|---------|-----------|
| Once a year            |  | 22.1%   | 45        |
| Once a month           |  | 35.8%   | 73        |
| Weekly                 |  | 15.7%   | 32        |
| More often than weekly |  | 26.5%   | 54        |

Totals: 204

### 34. Have you been medically evaluated for this?

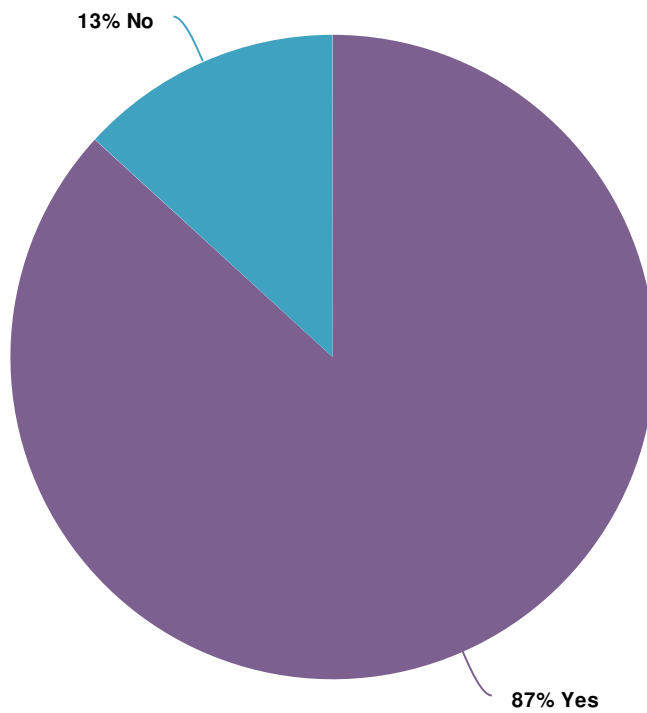

| Value |  | Percent | Responses          |
|-------|--|---------|--------------------|
| Yes   |  | 86.8%   | 178                |
| No    |  | 13.2%   | 27                 |
|       |  |         | <b>Totals: 205</b> |

35. If so, were you hospitalized for abdominal pain?

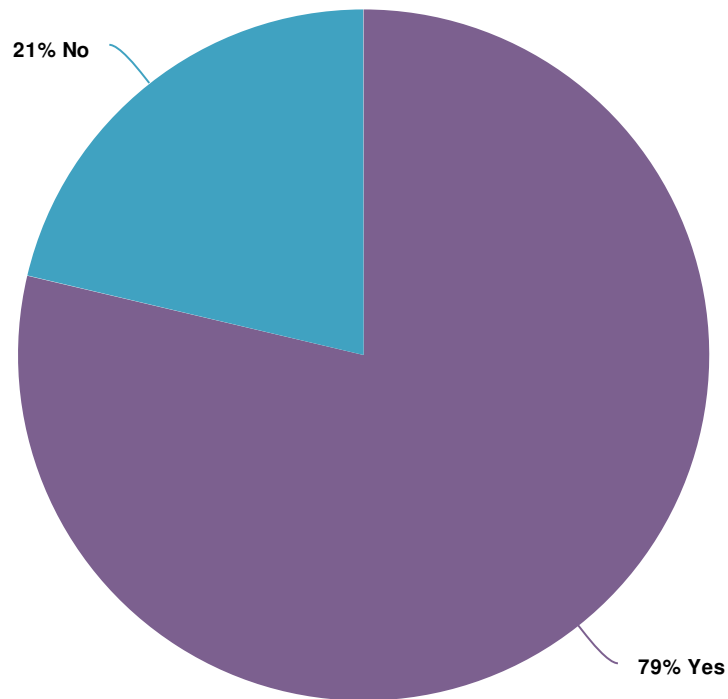

| Value |  | Percent | Responses |
|-------|--|---------|-----------|
| Yes   |  | 78.7%   | 140       |
| No    |  | 21.3%   | 38        |

Totals: 178

36. What were the results or diagnosis from the evaluation?

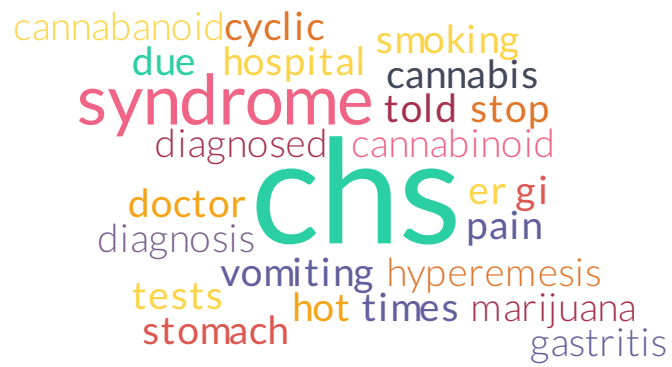

37. If you have suffered severe nausea, vomiting or abdominal pain, was the condition improved after cessation of cannabis usage for a long period of time?

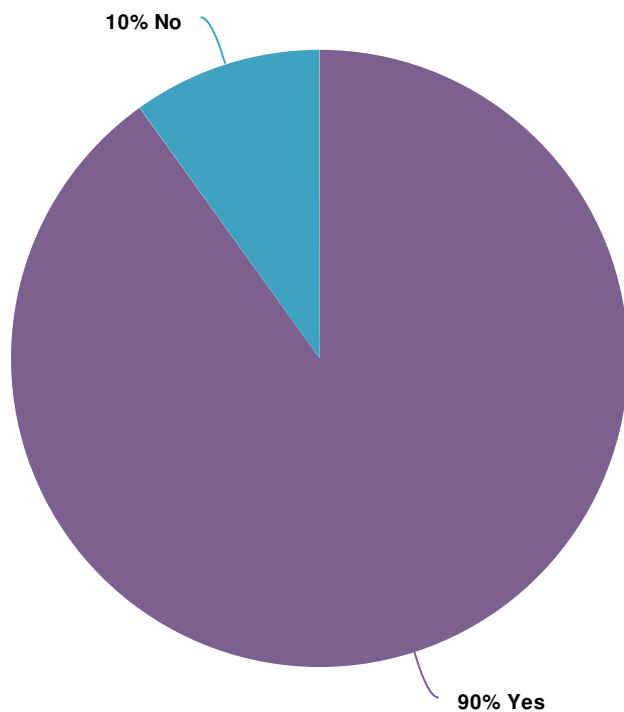

| Value |                                                                                     | Percent | Responses |
|-------|-------------------------------------------------------------------------------------|---------|-----------|
| Yes   |  | 90.1%   | 183       |
| No    |  | 9.9%    | 20        |

Totals: 203

38. If you have suffered severe nausea, vomiting or abdominal pain, was the condition improved by taking hot baths or showers?

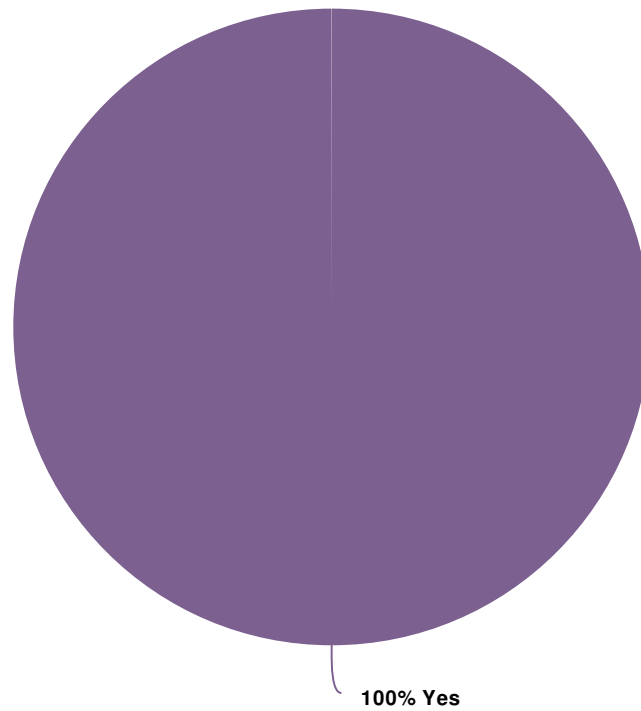

| Value |                                                                                     | Percent | Responses   |
|-------|-------------------------------------------------------------------------------------|---------|-------------|
| Yes   |  | 100.0%  | 205         |
|       |                                                                                     |         | Totals: 205 |



39. Have you ever been diagnosed as having the cannabinoid hyperemesis syndrome?

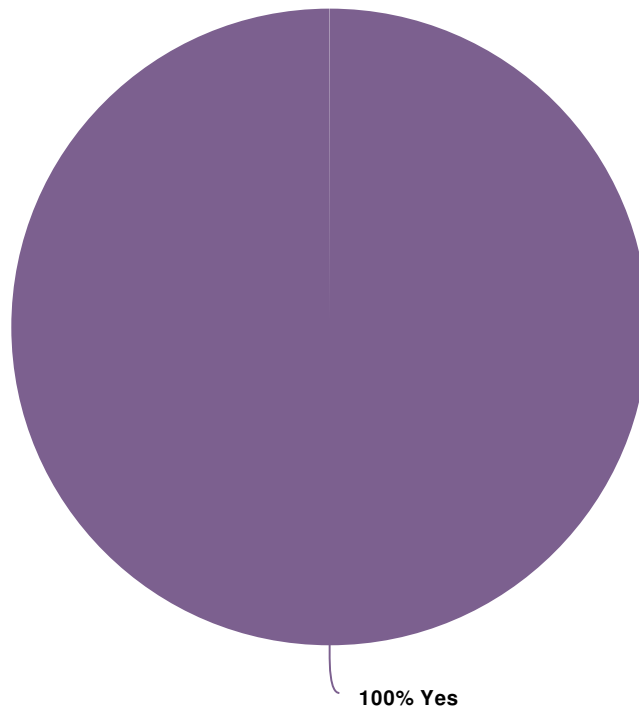

| Value |                                                                                     | Percent | Responses   |
|-------|-------------------------------------------------------------------------------------|---------|-------------|
| Yes   |  | 100.0%  | 205         |
|       |                                                                                     |         | Totals: 205 |

40. If yes, how long did you have symptoms before diagnosis?

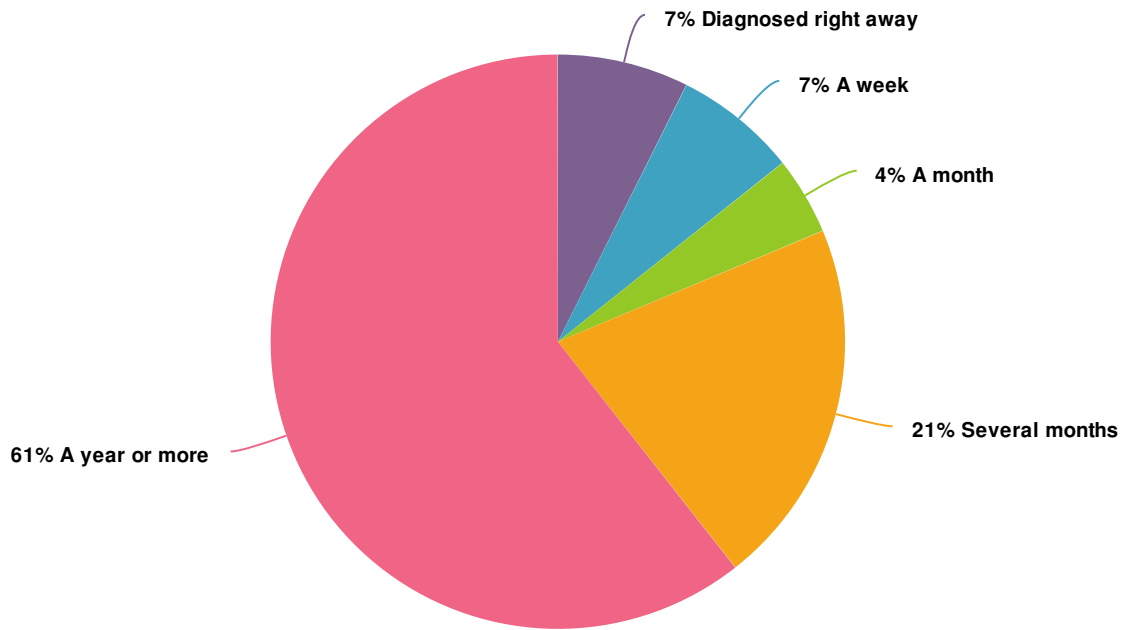

| Value                | Percent | Responses |
|----------------------|---------|-----------|
| Diagnosed right away | 7.4%    | 15        |
| A week               | 6.9%    | 14        |
| A month              | 4.4%    | 9         |
| Several months       | 20.7%   | 42        |
| A year or more       | 60.6%   | 123       |

Totals: 203

41. Estimate how much money your medical bills cost to evaluate your condition:

covered medicaidwork  
10,000 100,000  
free<sup>7</sup>4<sup>1</sup>2<sup>3,000</sup>  
9<sup>6</sup>or<sup>3</sup>3<sup>1</sup>5<sup>8</sup>10  
5,000<sup>20,000</sup>  
years bills insurance  
2,000

42. What attempted treatments have you received (check as many as apply)?

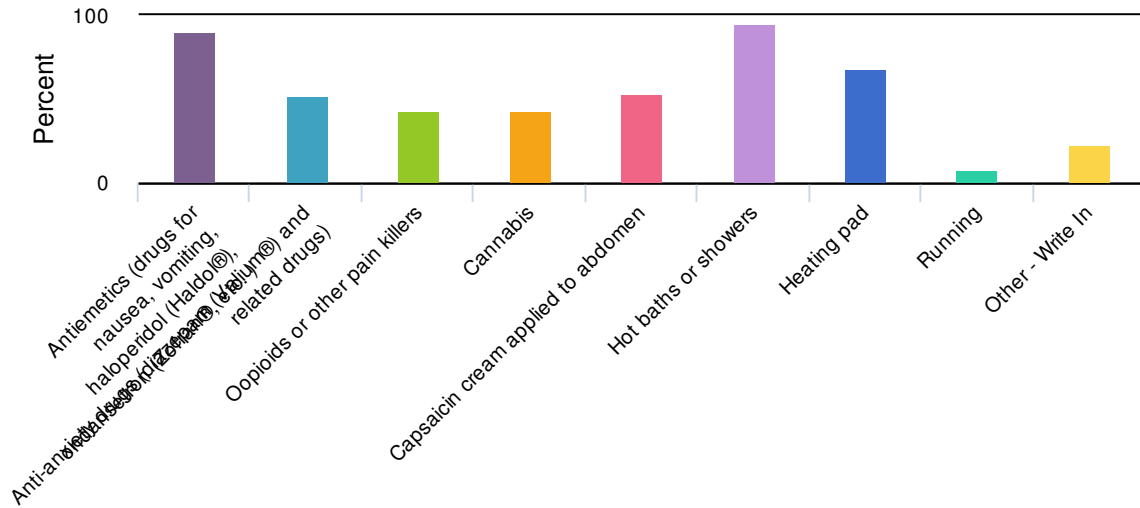

| Value                                                                                        | Percent | Responses |
|----------------------------------------------------------------------------------------------|---------|-----------|
| Antiemetics (drugs for nausea, vomiting, haloperidol (Haldol®), ondansetron (Zofran®, etc. ) | 90.2%   | 184       |
| Anti-anxiety drugs (diazepam (Valium®) and related drugs)                                    | 52.0%   | 106       |
| Opioids or other pain killers                                                                | 43.1%   | 88        |
| Cannabis                                                                                     | 43.6%   | 89        |
| Capsaicin cream applied to abdomen                                                           | 53.4%   | 109       |
| Hot baths or showers                                                                         | 95.6%   | 195       |
| Heating pad                                                                                  | 68.6%   | 140       |
| Running                                                                                      | 8.3%    | 17        |
| Other - Write In                                                                             | 23.0%   | 47        |

43. What were the results of your treatment (what helped, what did not)?

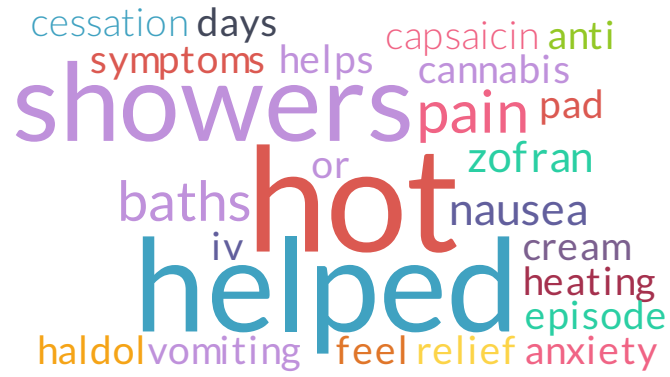

#### 44. How long did episodes last?

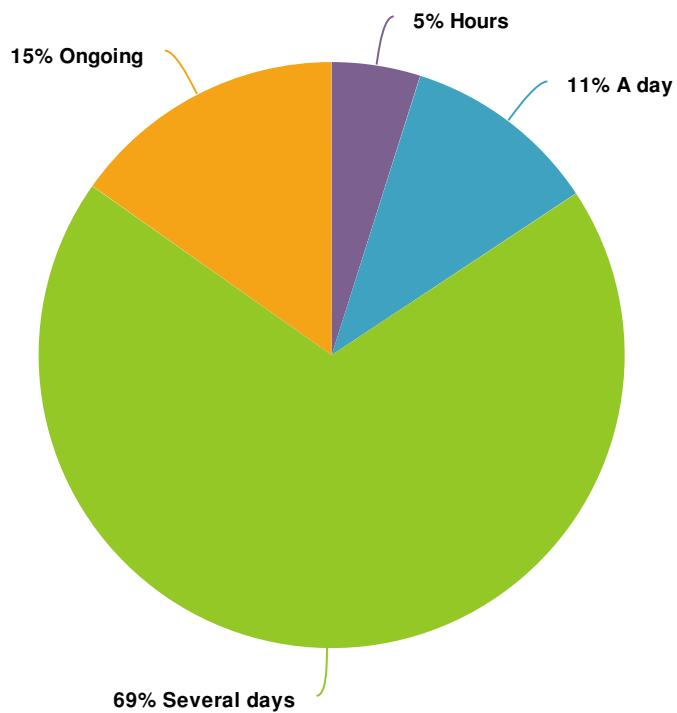

| Value        | Percent | Responses |
|--------------|---------|-----------|
| Hours        | 4.9%    | 10        |
| A day        | 10.8%   | 22        |
| Several days | 69.1%   | 141       |
| Ongoing      | 15.2%   | 31        |

Totals: 204

### 45. Did the condition improve after cessation of cannabis usage?

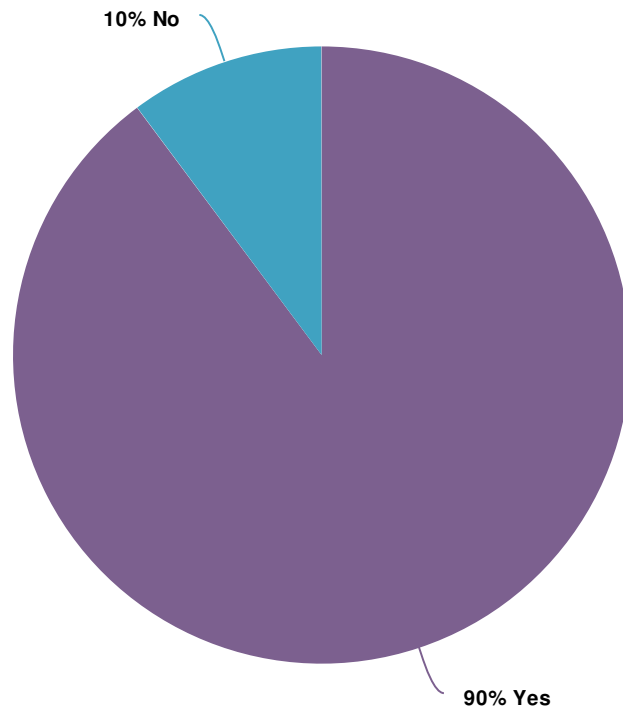

| Value |                                                                                     | Percent | Responses |
|-------|-------------------------------------------------------------------------------------|---------|-----------|
| Yes   |  | 89.8%   | 184       |
| No    |  | 10.2%   | 21        |

Totals: 205

46. After how long?

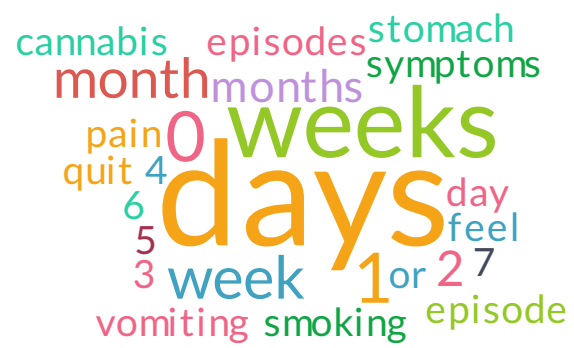



47. After a period of abstinence from cannabis, did you resume its usage?

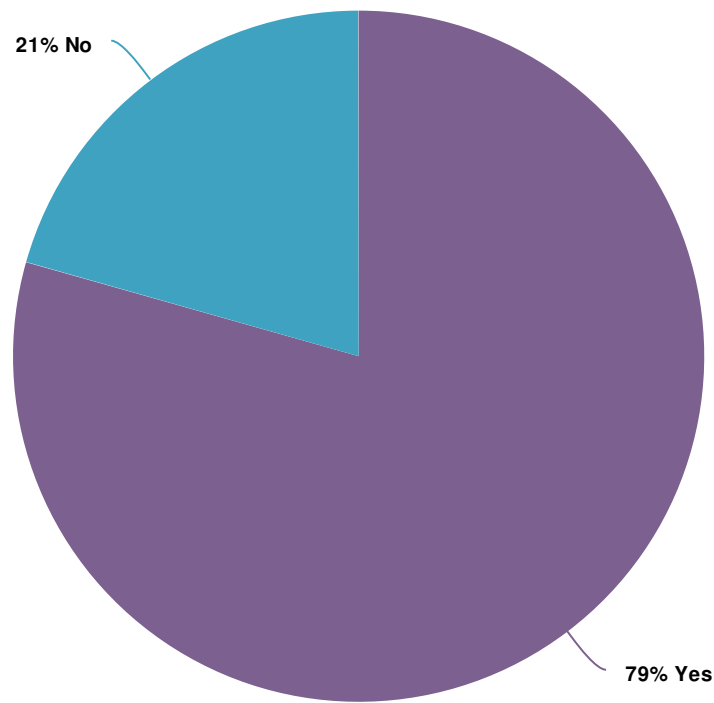

| Value |                                                                                     | Percent | Responses |
|-------|-------------------------------------------------------------------------------------|---------|-----------|
| Yes   |  | 79.4%   | 162       |
| No    |  | 20.6%   | 42        |

Totals: 204

48. If yes, what happened upon resumption?

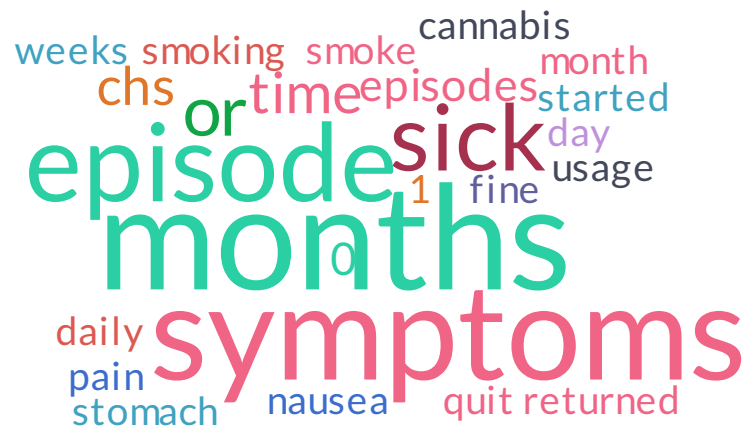

## 49. How long was it before symptoms returned?

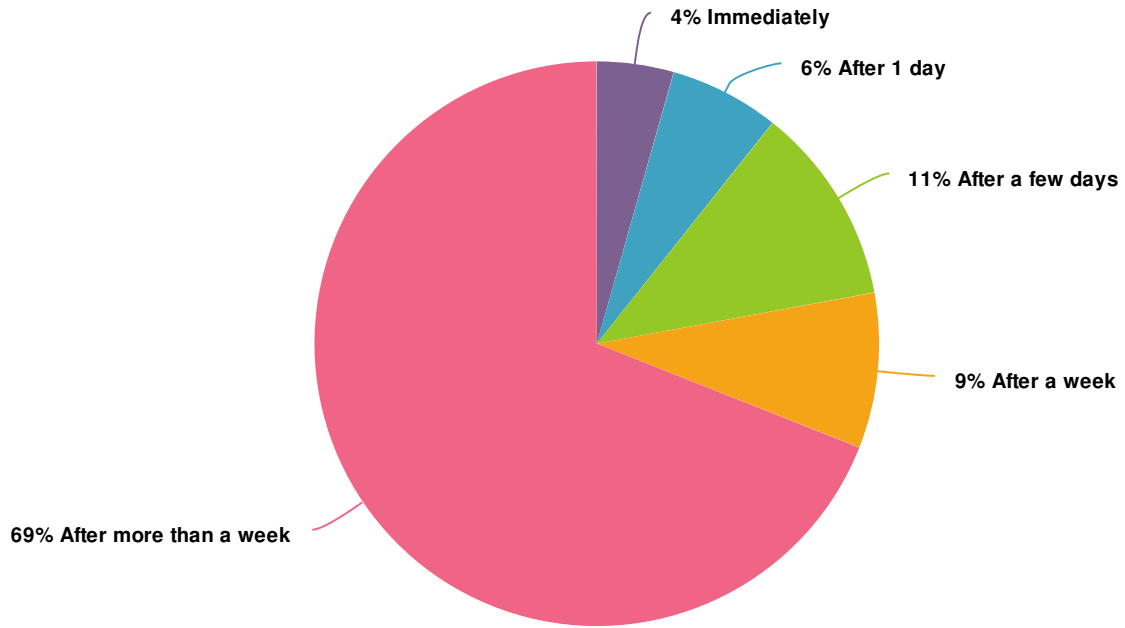

| Value                  | Percent | Responses |
|------------------------|---------|-----------|
| Immediately            | 4.4%    | 7         |
| After 1 day            | 6.3%    | 10        |
| After a few days       | 11.4%   | 18        |
| After a week           | 8.9%    | 14        |
| After more than a week | 69.0%   | 109       |

Totals: 158

50. Before symptoms returned, had you increased your cannabis intake (developed tolerance)?

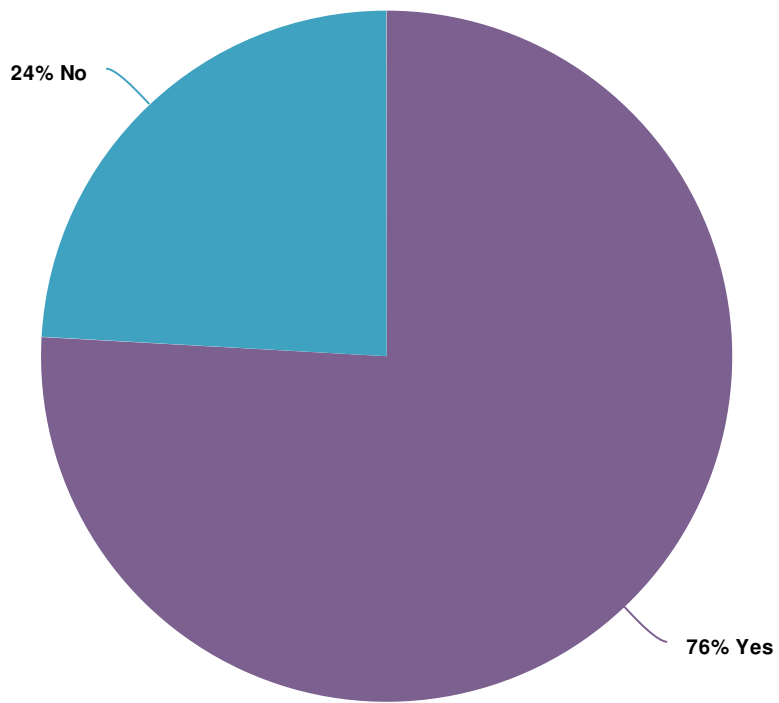

| Value |  | Percent | Responses |
|-------|--|---------|-----------|
| Yes   |  | 75.9%   | 123       |
| No    |  | 24.1%   | 39        |

Totals: 162

51. If you resumed, did you try substituting CBD-predominant cannabis?

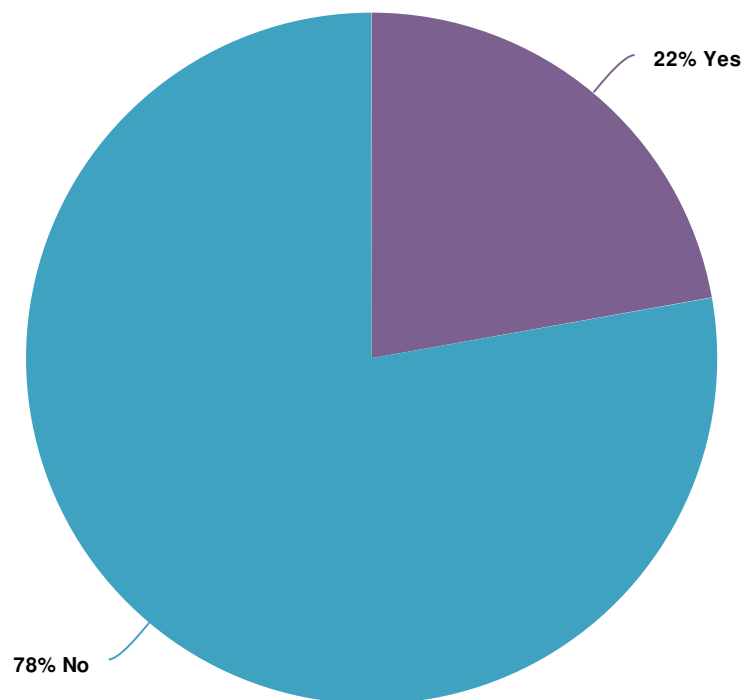

| Value |                                                                                     | Percent | Responses |
|-------|-------------------------------------------------------------------------------------|---------|-----------|
| Yes   |  | 22.2%   | 36        |
| No    |  | 77.8%   | 126       |

Totals: 162

## 52. Have you tried other forms of cannabis for this?

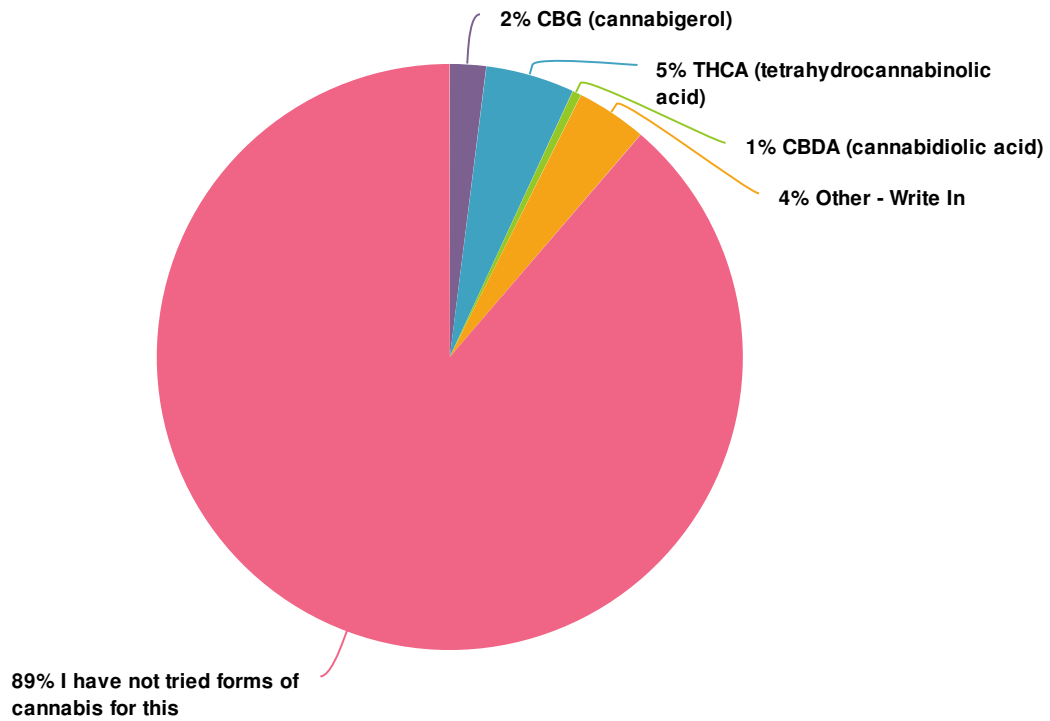

| Value                                       | Percent | Responses |
|---------------------------------------------|---------|-----------|
| CBG (cannabigerol)                          | 2.0%    | 4         |
| THCA (tetrahydrocannabinolic acid)          | 4.9%    | 10        |
| CBDA (cannabidiolic acid)                   | 0.5%    | 1         |
| Other - Write In                            | 3.9%    | 8         |
| I have not tried forms of cannabis for this | 88.7%   | 181       |

Totals: 204

53. What was the result of use of these other forms of cannabis?

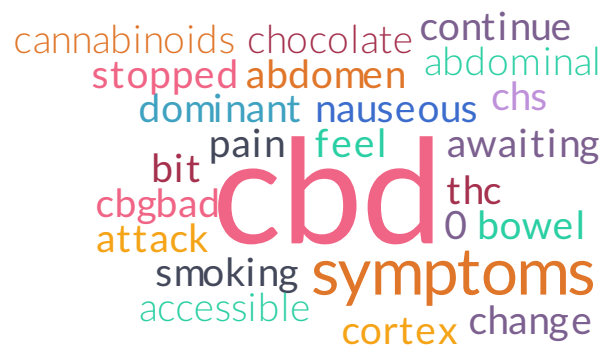

54. Do you have an opinion as to the cause of cannabinoid hyperemesis syndrome?

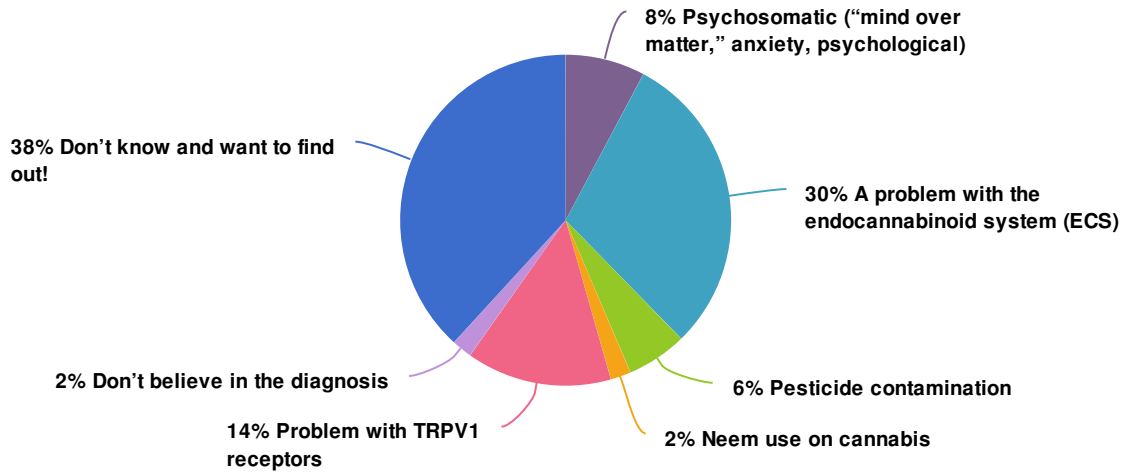

| Value                                                      | Percent | Responses |
|------------------------------------------------------------|---------|-----------|
| Psychosomatic ("mind over matter," anxiety, psychological) | 7.8%    | 16        |
| A problem with the endocannabinoid system (ECS)            | 29.9%   | 61        |
| Pesticide contamination                                    | 5.9%    | 12        |
| Neem use on cannabis                                       | 2.0%    | 4         |
| Problem with TRPV1 receptors                               | 14.2%   | 29        |
| Don't believe in the diagnosis                             | 2.0%    | 4         |
| Don't know and want to find out!                           | 38.2%   | 78        |

Totals: 204
