# Supplementary material for: Cannabinoid Hyperemesis Syndrome Survey and Genomic Investigation
Source: PubMed Central journal article supplement — Cannabis Cannabinoid Res. 2022 Jun 6;7(3):336–44. doi: 10.1089/can.2021.0046 (PMC9225400; doi:10.1089/can.2021.0046), 2022-06-06
Supplement: Supp_App2.pdf [file Supp_App2.pdf]

This report is filtered

Only show: #10 Question "Have you used cannabis ("marijuana") within the last year?" is one of the following answers ("Yes") and #30 Question "Do you suffer from periodic severe nausea and vomiting?" is one of the following answers ("No") and #37 Question "Do you suffer from periodic severe abdominal pain?" is one of the following answers ("No") and #44 Question "If you have suffered severe nausea, vomiting or abdominal pain, was the condition improved by taking hot baths or showers?" is one of the following answers ("No") and #45 Question "Have you ever been diagnosed as having the cannabinoid hyperemesis syndrome?" is one of the following answers ("No")

# Report for Studysurvey

## 1. Gender:

Filter: #10 Question "Have you used cannabis ("marijuana") within the last year?" is one of the following answers ("Yes")

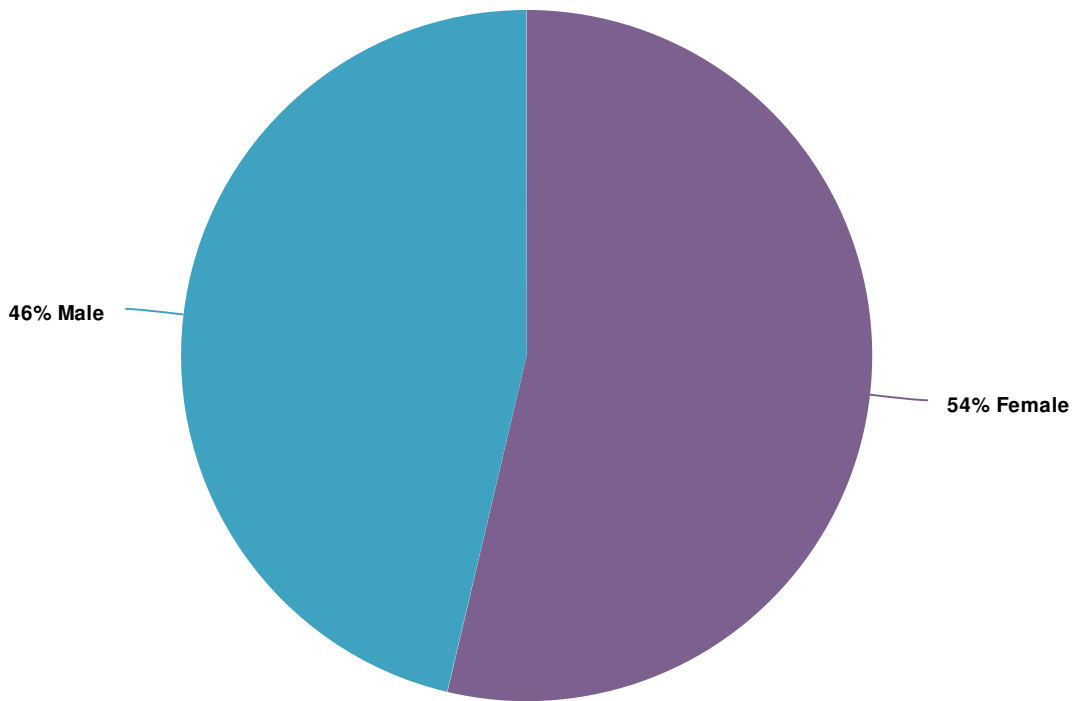

| Value  | Percent | Responses |
|--------|---------|-----------|
| Female | 53.7%   | 29        |
| Male   | 46.3%   | 25        |

Totals: 54



2. Please check any medications you are currently using or were taking recently: 2C19 Inhibitors

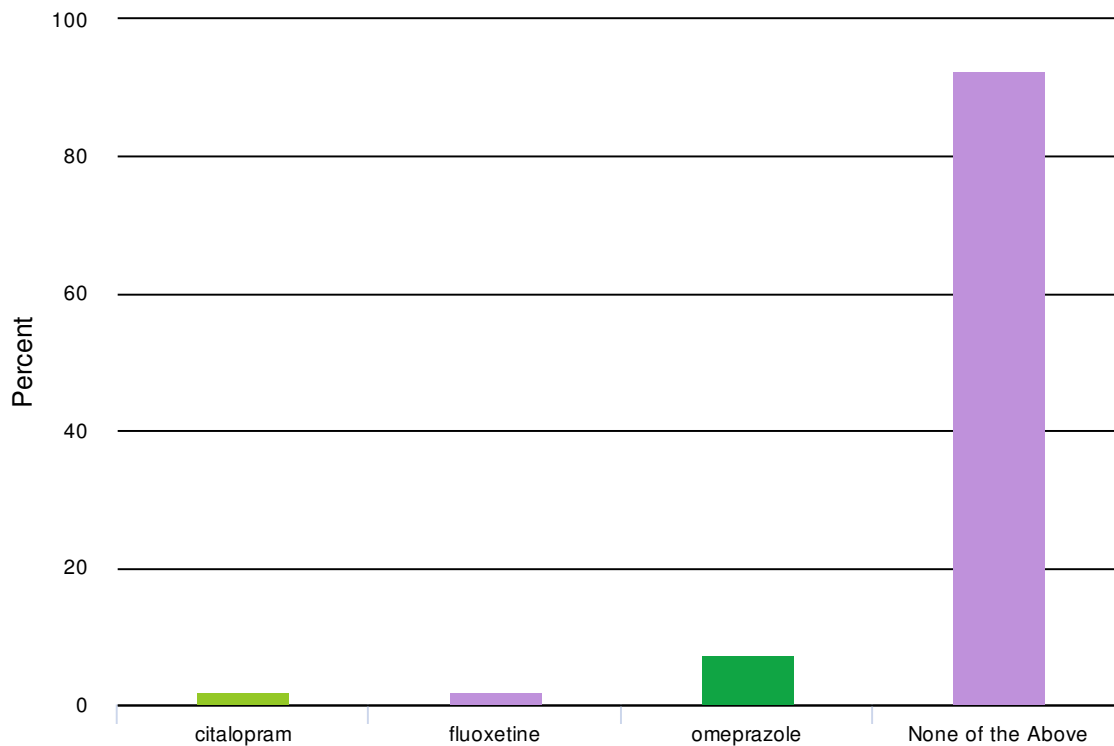

| Value             | Percent | Responses |
|-------------------|---------|-----------|
| omeprazole        | 7.4%    | 4         |
| None of the Above | 92.6%   | 50        |
| citalopram        | 1.9%    | 1         |
| fluoxetine        | 1.9%    | 1         |

### 3. Please check any medications you are currently using or were taking recently: 3A457 Inhibitors

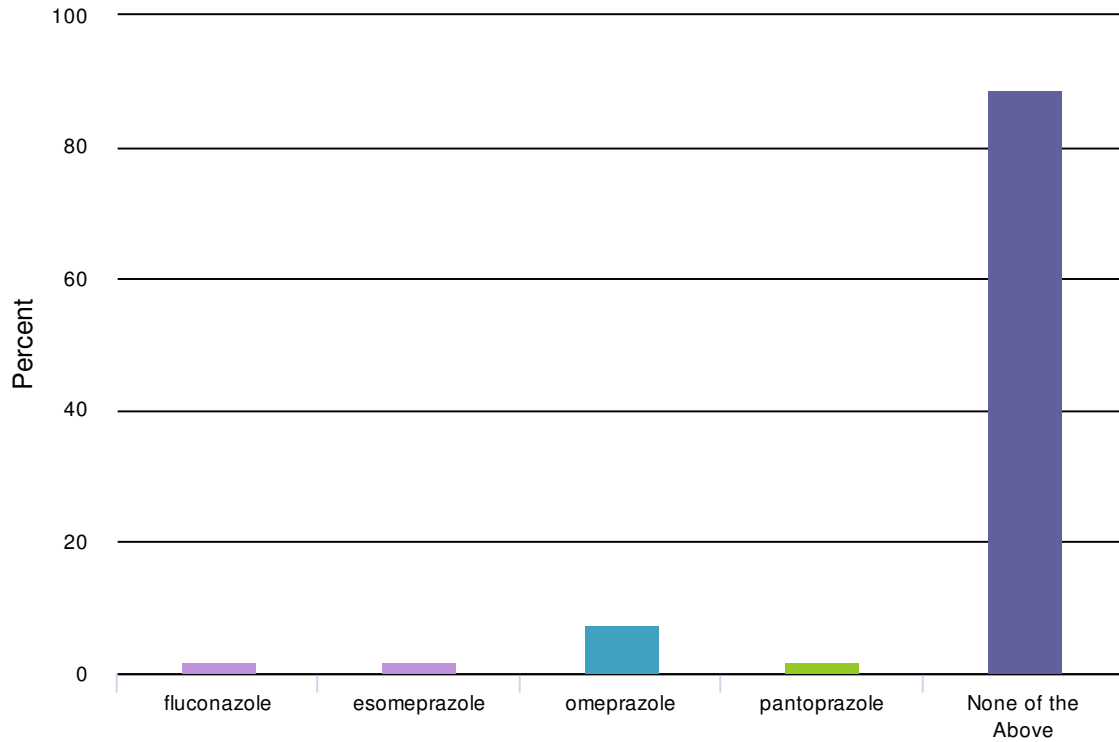

| Value             | Percent | Responses |
|-------------------|---------|-----------|
| omeprazole        | 7.4%    | 4         |
| None of the Above | 88.9%   | 48        |
| fluconazole       | 1.9%    | 1         |
| esomeprazole      | 1.9%    | 1         |
| pantoprazole      | 1.9%    | 1         |

4. Have you used cannabis (“marijuana”) within the last year?

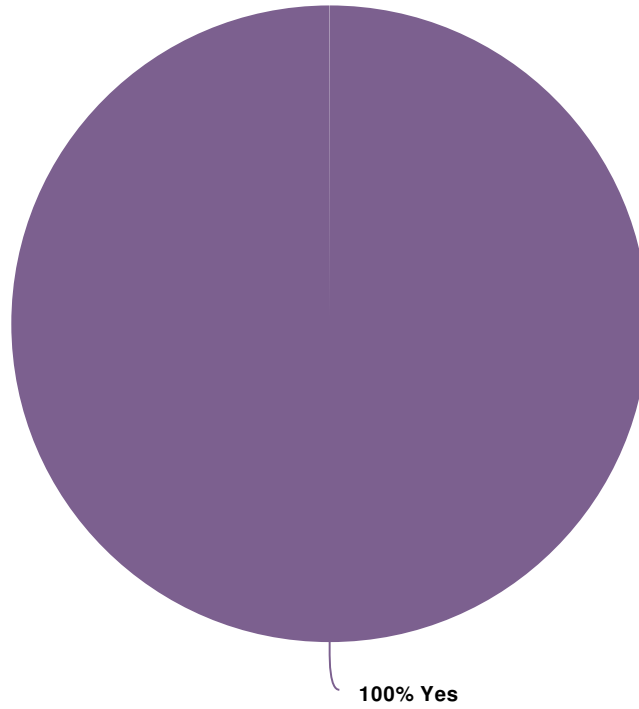

| Value |                                                                           | Percent | Responses |
|-------|---------------------------------------------------------------------------|---------|-----------|
| Yes   | <div style="width: 100%; height: 15px; background-color: #6a3d9a;"></div> | 100.0%  | 54        |

Totals: 54

## 5. If yes, how often?

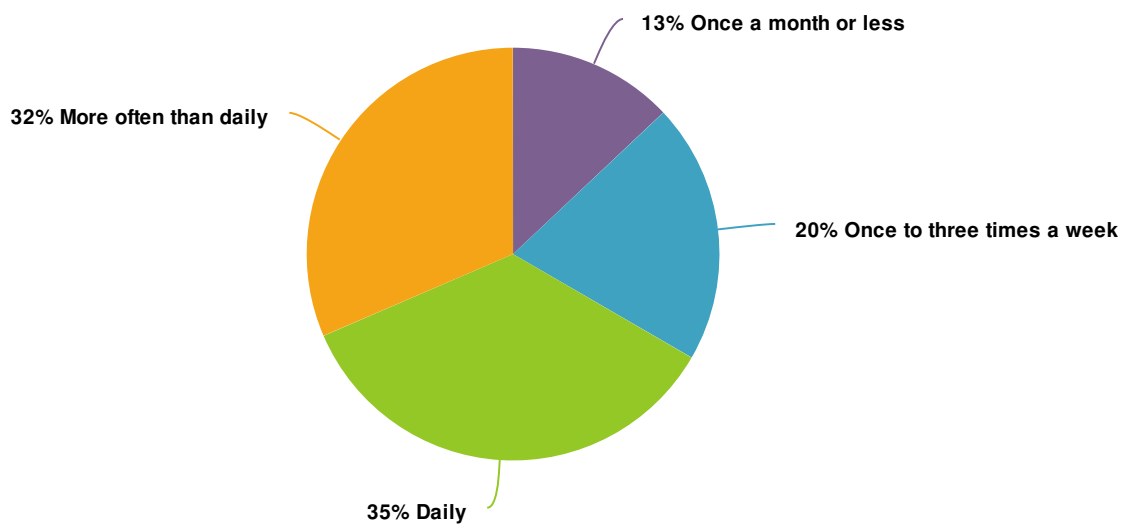

| Value                      |  | Percent | Responses |
|----------------------------|--|---------|-----------|
| Once a month or less       |  | 13.0%   | 7         |
| Once to three times a week |  | 20.4%   | 11        |
| Daily                      |  | 35.2%   | 19        |
| More often than daily      |  | 31.5%   | 17        |

Totals: 54

## 6. How do you use cannabis (check as many as apply to you)?

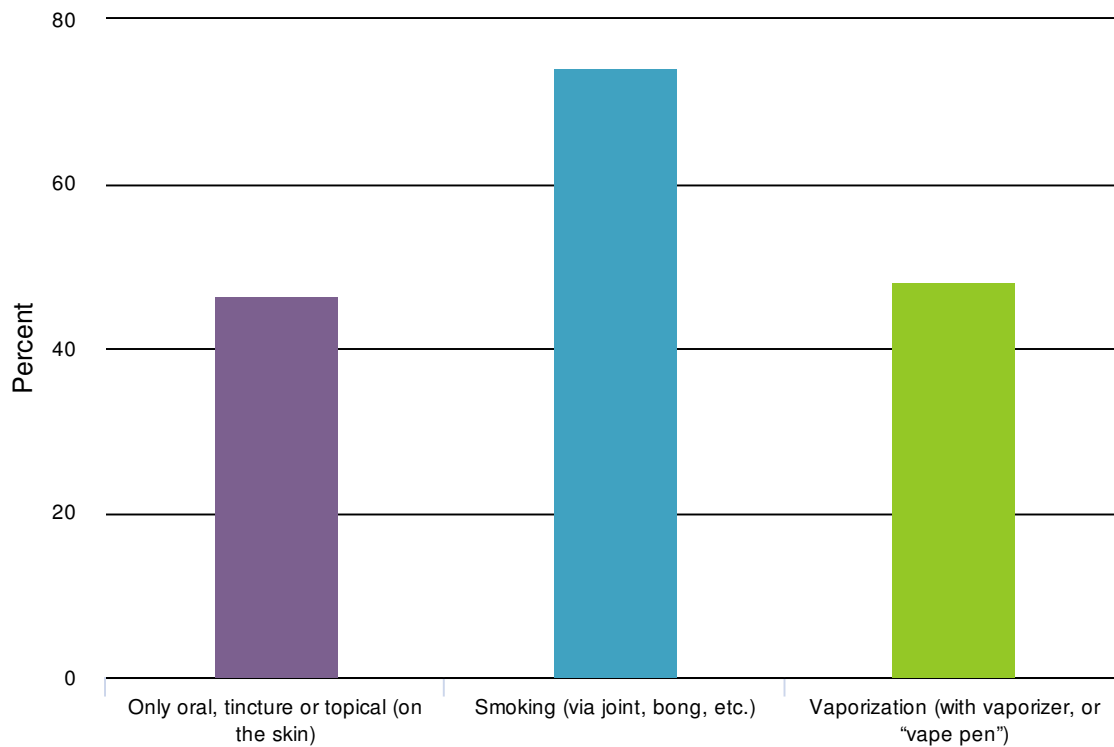

| Value                                        |                                                                                     | Percent | Responses |
|----------------------------------------------|-------------------------------------------------------------------------------------|---------|-----------|
| Only oral, tincture or topical (on the skin) |  | 46.3%   | 25        |
| Smoking (via joint, bong, etc.)              |  | 74.1%   | 40        |
| Vaporization (with vaporizer, or "vape pen") |  | 48.1%   | 26        |

### 7. For smoking or vaporization, do you use?:

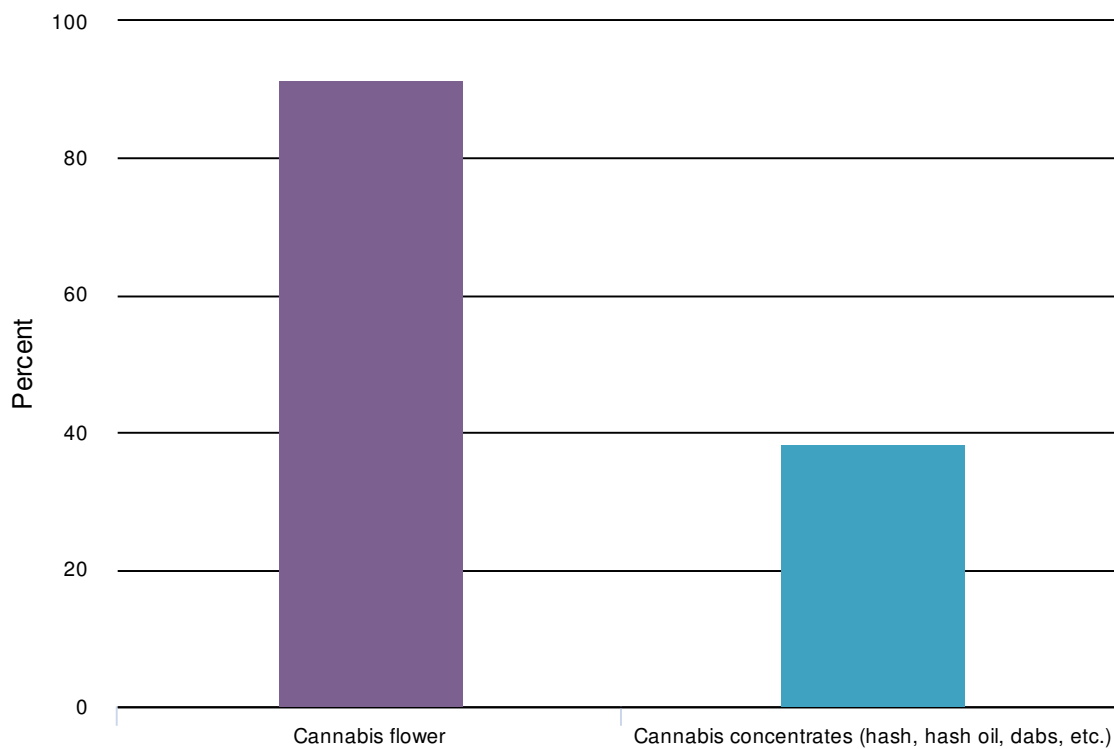

| Value                                              |                                                                                      | Percent | Responses |
|----------------------------------------------------|--------------------------------------------------------------------------------------|---------|-----------|
| Cannabis flower                                    |  | 91.5%   | 43        |
| Cannabis concentrates (hash, hash oil, dabs, etc.) |  | 38.3%   | 18        |



### 8. How many grams of cannabis flower do you use per day?

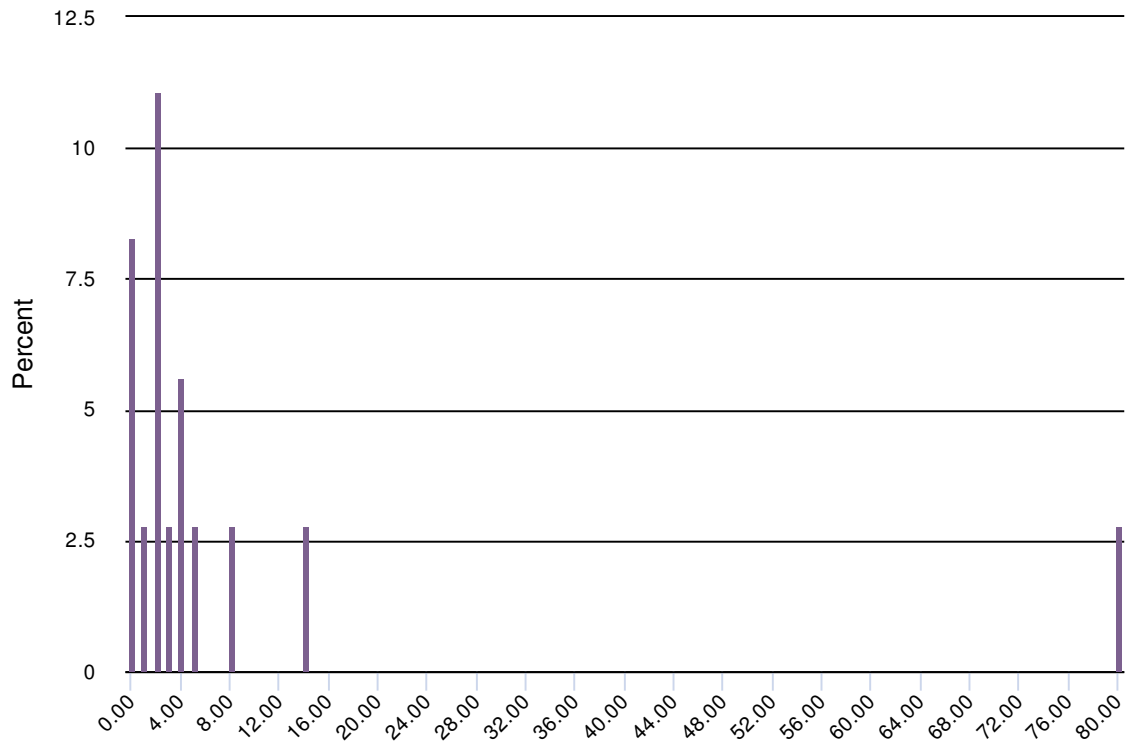

9. How many inhalations of cannabis concentrates do you take per day?

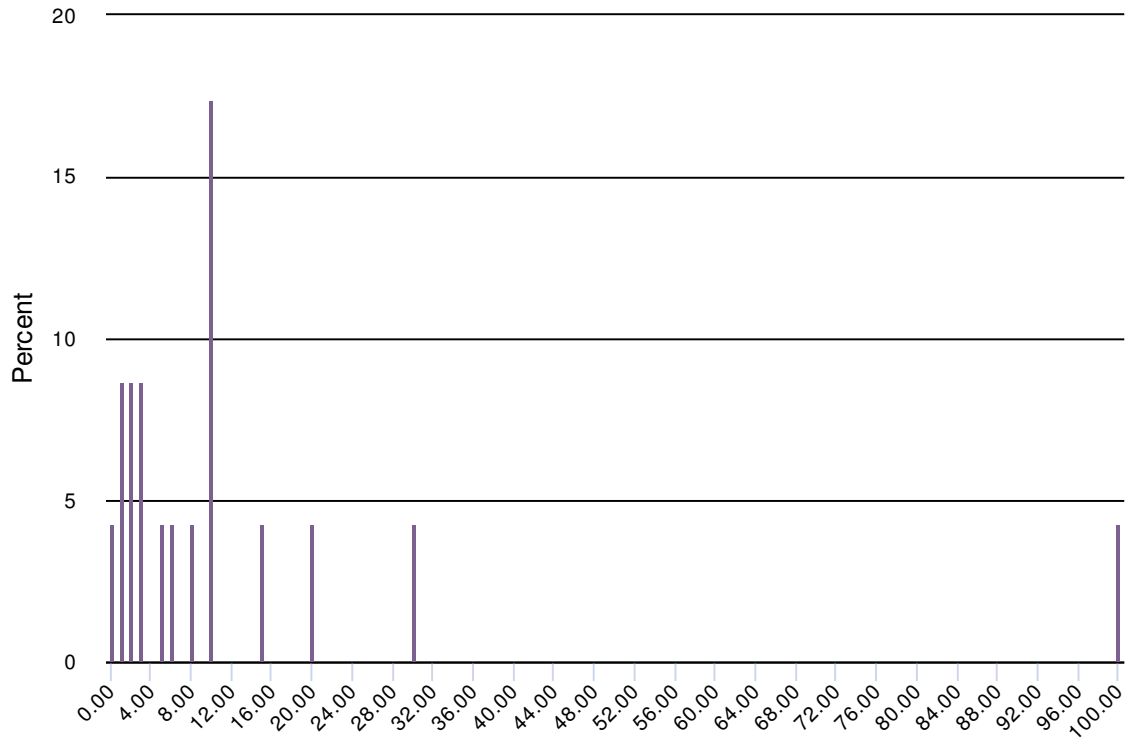

10. Do you know the composition of the cannabis that you use most often?

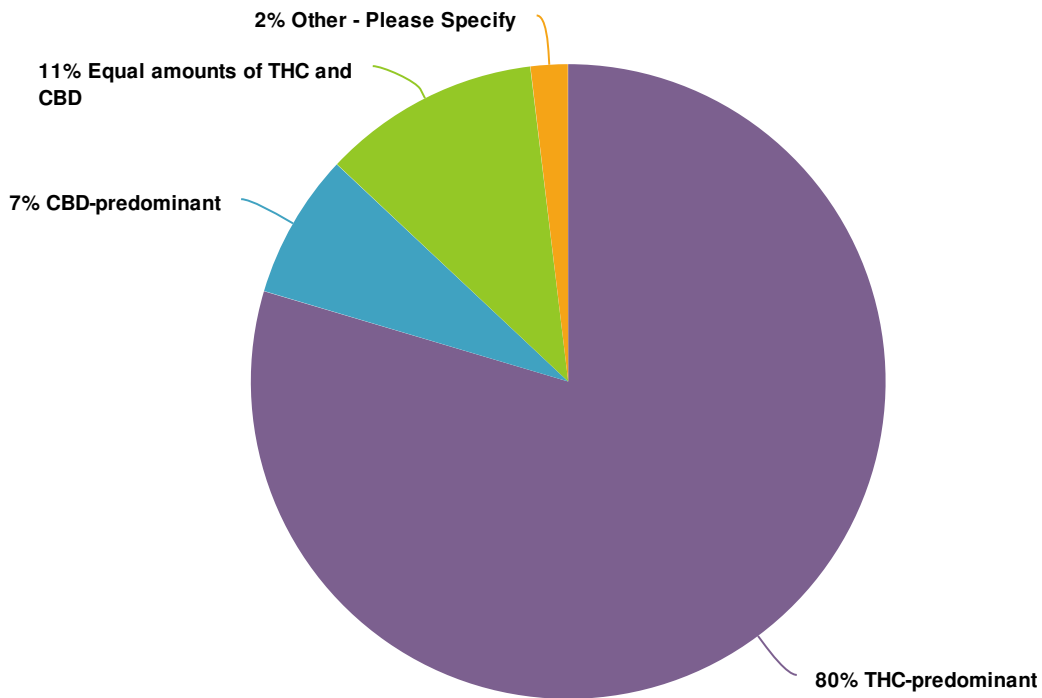

| Value                        | Percent | Responses |
|------------------------------|---------|-----------|
| THC-predominant              | 79.6%   | 43        |
| CBD-predominant              | 7.4%    | 4         |
| Equal amounts of THC and CBD | 11.1%   | 6         |
| Other - Please Specify       | 1.9%    | 1         |

Totals: 54

### 11. Is your use of cannabis:

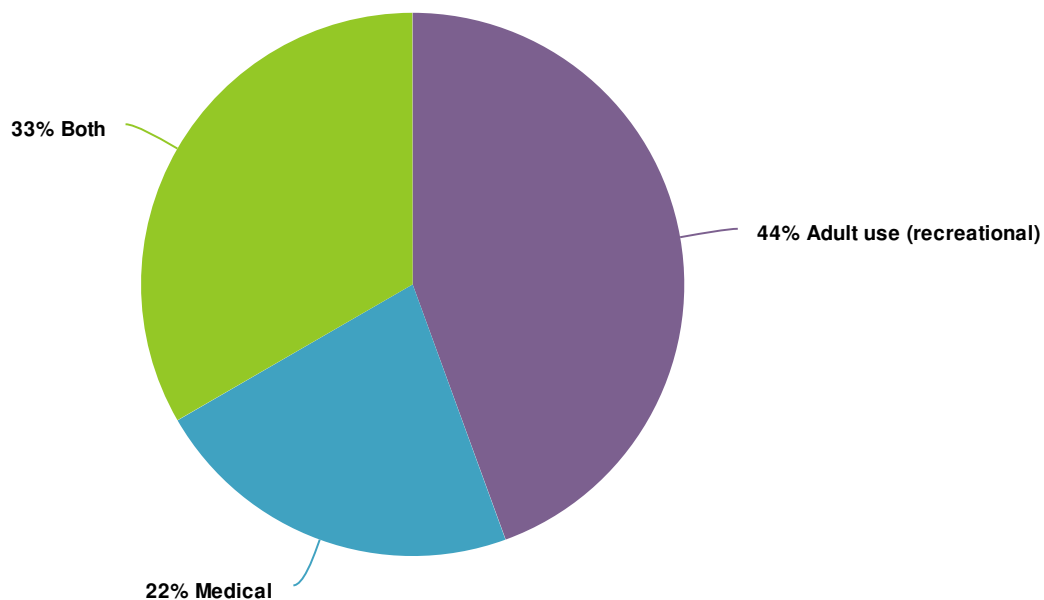

| Value                    |                                                                                     | Percent | Responses |
|--------------------------|-------------------------------------------------------------------------------------|---------|-----------|
| Adult use (recreational) |  | 44.4%   | 24        |
| Medical                  |  | 22.2%   | 12        |
| Both                     |  | 33.3%   | 18        |

Totals: 54

12. If your use is medical, for what condition(s) (check all that apply):

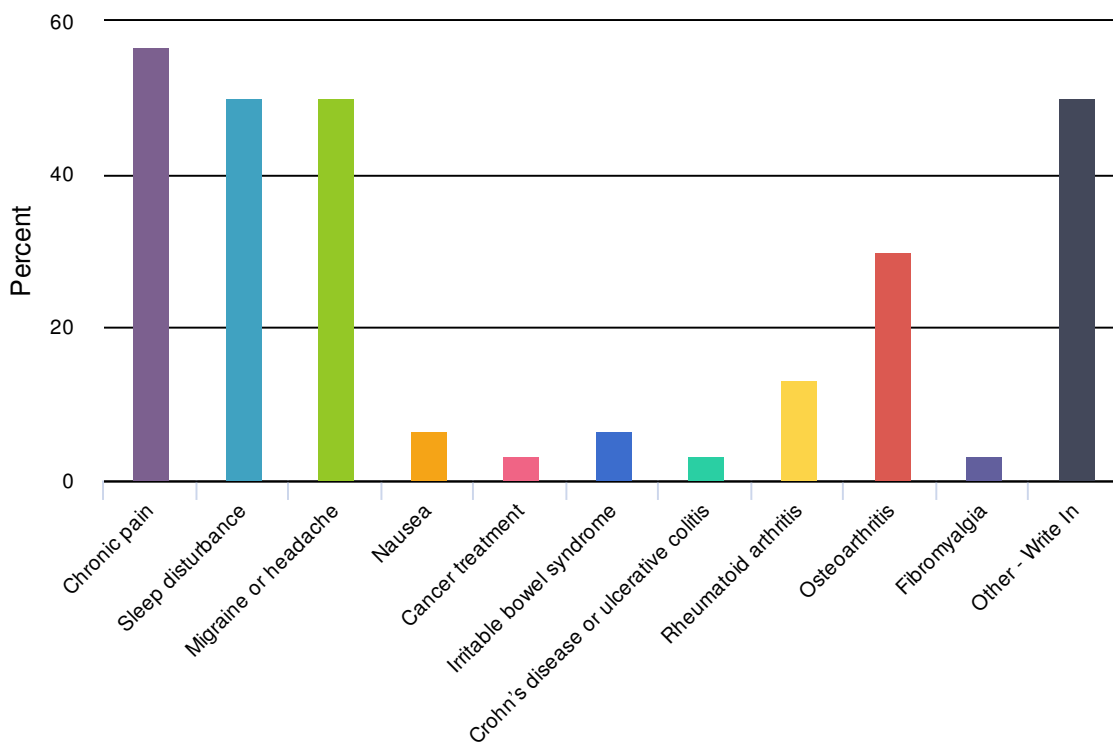

| Value                                 | Percent | Responses |
|---------------------------------------|---------|-----------|
| Chronic pain                          | 56.7%   | 17        |
| Sleep disturbance                     | 50.0%   | 15        |
| Migraine or headache                  | 50.0%   | 15        |
| Nausea                                | 6.7%    | 2         |
| Cancer treatment                      | 3.3%    | 1         |
| Irritable bowel syndrome              | 6.7%    | 2         |
| Crohn's disease or ulcerative colitis | 3.3%    | 1         |
| Rheumatoid arthritis                  | 13.3%   | 4         |
| Osteoarthritis                        | 30.0%   | 9         |
| Fibromyalgia                          | 3.3%    | 1         |
| Other - Write In                      | 50.0%   | 15        |

13. Have you ever been diagnosed or treated for cannabis dependency or addiction?

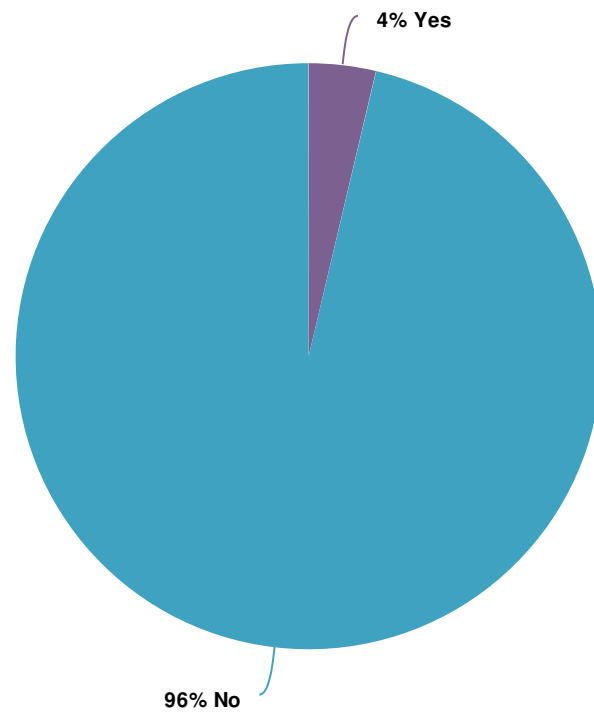

| Value |                                                                                     | Percent | Responses |
|-------|-------------------------------------------------------------------------------------|---------|-----------|
| Yes   |  | 3.7%    | 2         |
| No    |  | 96.3%   | 52        |

Totals: 54

14. Have you ever been told that you should stop cannabis use for health reasons?

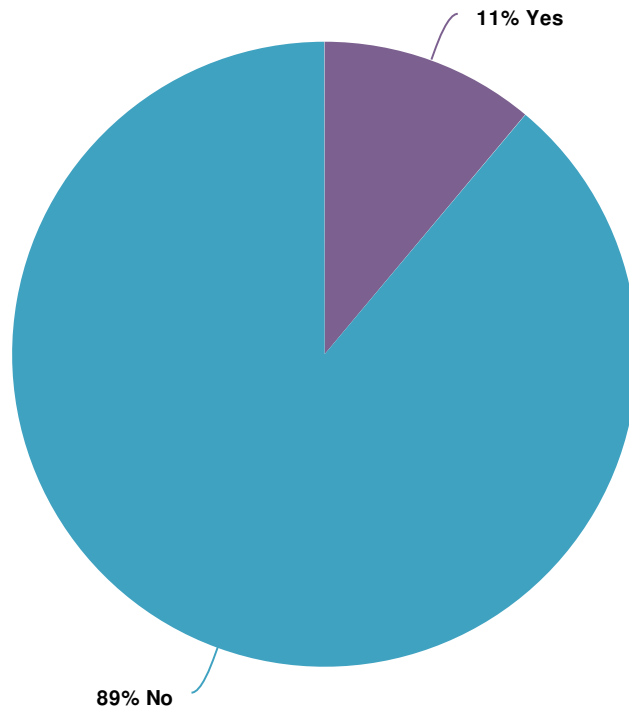

| Value |                                                                                     | Percent | Responses |
|-------|-------------------------------------------------------------------------------------|---------|-----------|
| Yes   |  | 11.1%   | 6         |
| No    |  | 88.9%   | 48        |

Totals: 54

15. Have you ever had withdrawal symptoms after stopping cannabis usage?

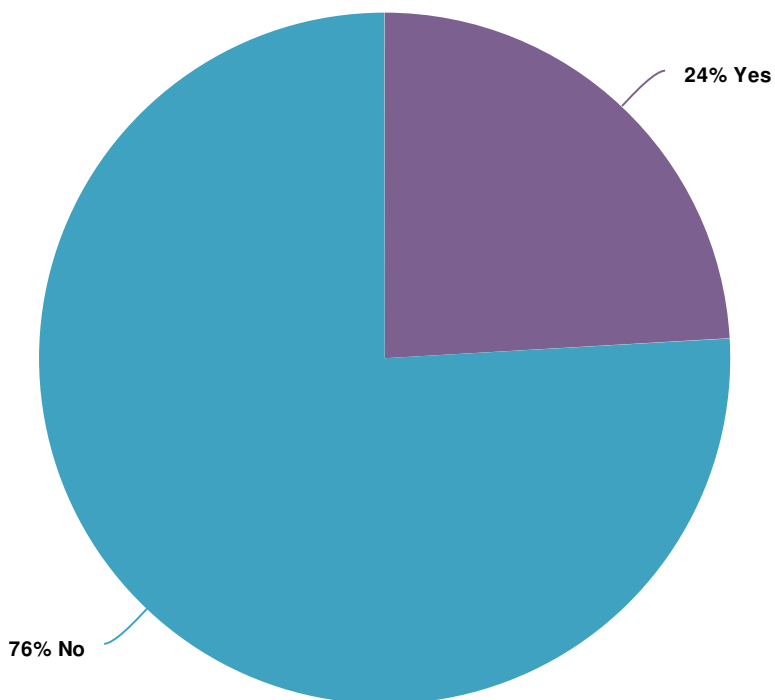

| Value |                                                                                     | Percent | Responses |
|-------|-------------------------------------------------------------------------------------|---------|-----------|
| Yes   |  | 24.1%   | 13        |
| No    |  | 75.9%   | 41        |

Totals: 54



16. If yes, you have had withdrawal symptoms, what were they?  
 (Check all that apply):

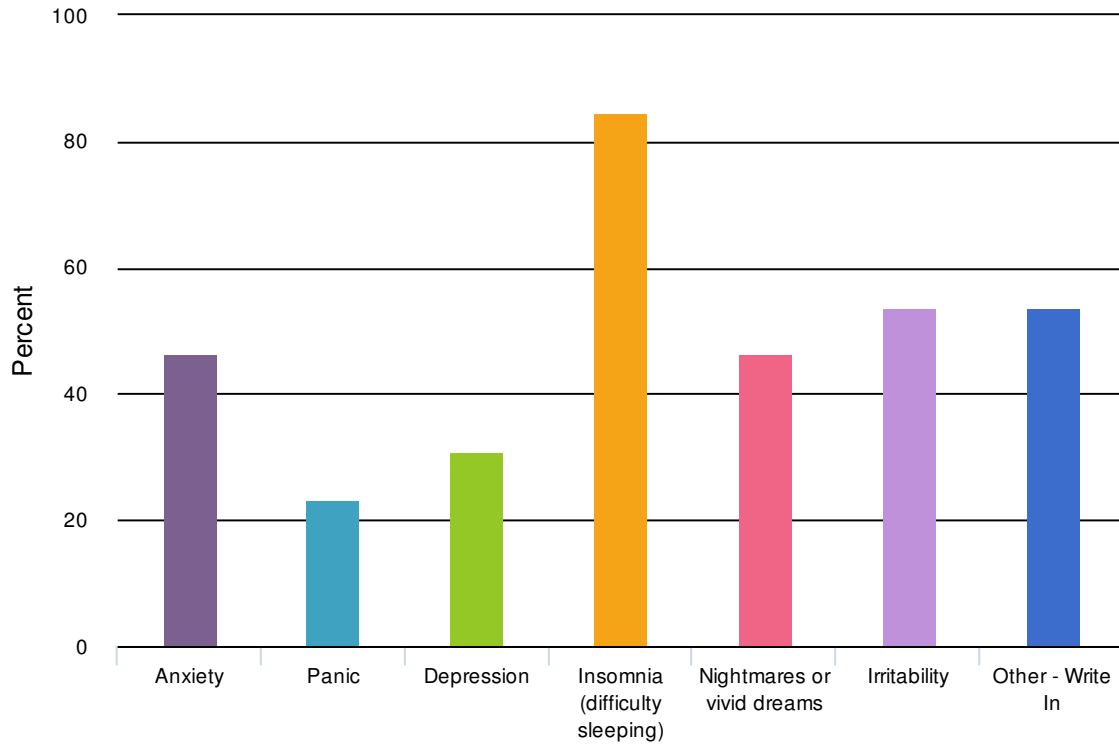

| Value                          | Percent | Responses |
|--------------------------------|---------|-----------|
| Anxiety                        | 46.2%   | 6         |
| Panic                          | 23.1%   | 3         |
| Depression                     | 30.8%   | 4         |
| Insomnia (difficulty sleeping) | 84.6%   | 11        |
| Nightmares or vivid dreams     | 46.2%   | 6         |
| Irritability                   | 53.8%   | 7         |
| Other - Write In               | 53.8%   | 7         |

17. If female, are you currently pregnant?

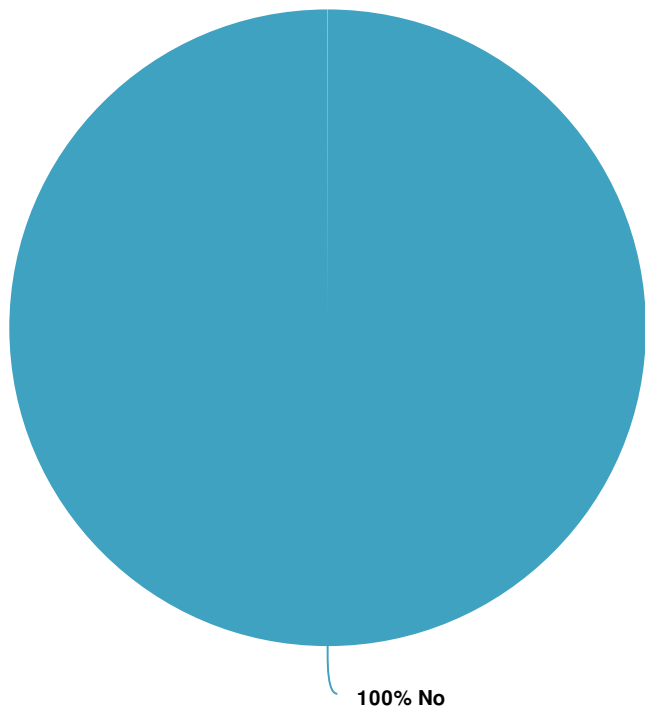

| Value             | Percent | Responses |
|-------------------|---------|-----------|
| No                | 100.0%  | 29        |
| <b>Totals: 29</b> |         |           |

18. If female, have you ever had severe morning sickness or hyperemesis gravidarum?

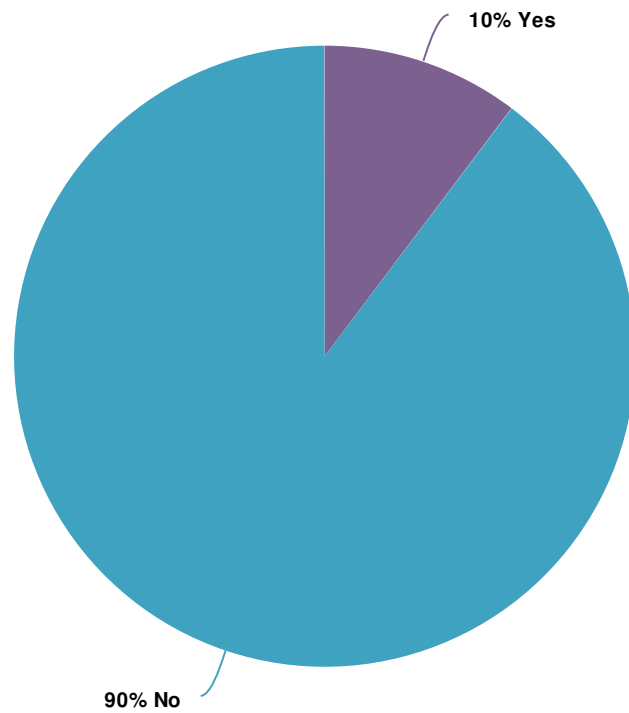

| Value |                                                                                     | Percent | Responses |
|-------|-------------------------------------------------------------------------------------|---------|-----------|
| Yes   |  | 10.3%   | 3         |
| No    |  | 89.7%   | 26        |

Totals: 29

19. Have you ever been diagnosed by a doctor as having “cyclic vomiting syndrome?”

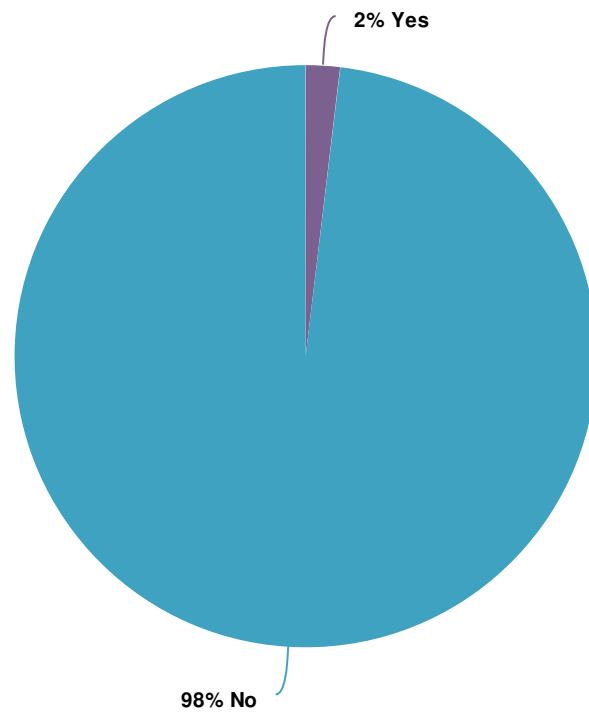

| Value |                                                                            | Percent | Responses |
|-------|----------------------------------------------------------------------------|---------|-----------|
| Yes   | <div style="width: 1.9%; height: 15px; background-color: #cccccc;"></div>  | 1.9%    | 1         |
| No    | <div style="width: 98.1%; height: 15px; background-color: #00838f;"></div> | 98.1%   | 53        |

Totals: 54

## 20. Do you suffer from migraine headaches?

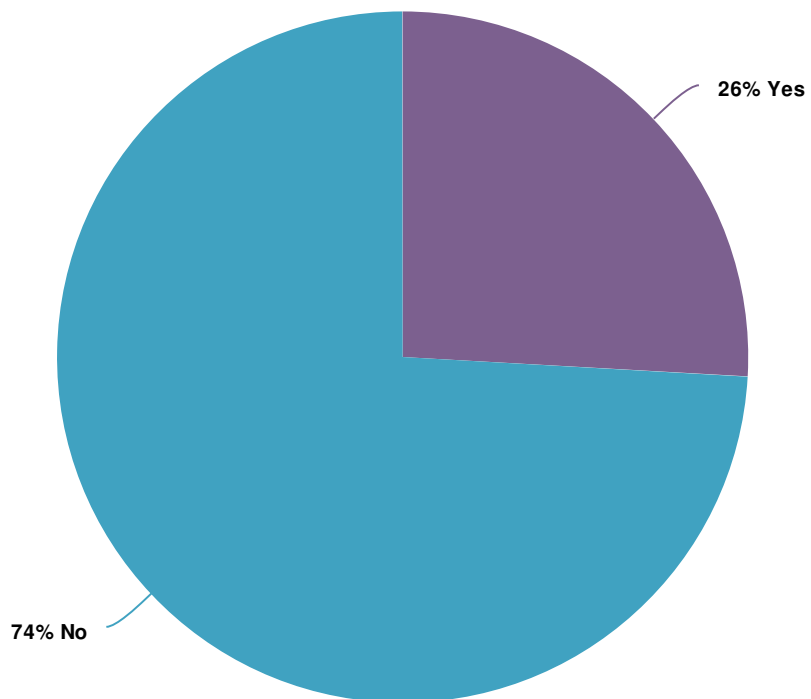

| Value | Percent | Responses |
|-------|---------|-----------|
| Yes   | 25.9%   | 14        |
| No    | 74.1%   | 40        |

**Totals: 54**

## 21. Have you ever suffered a head injury?

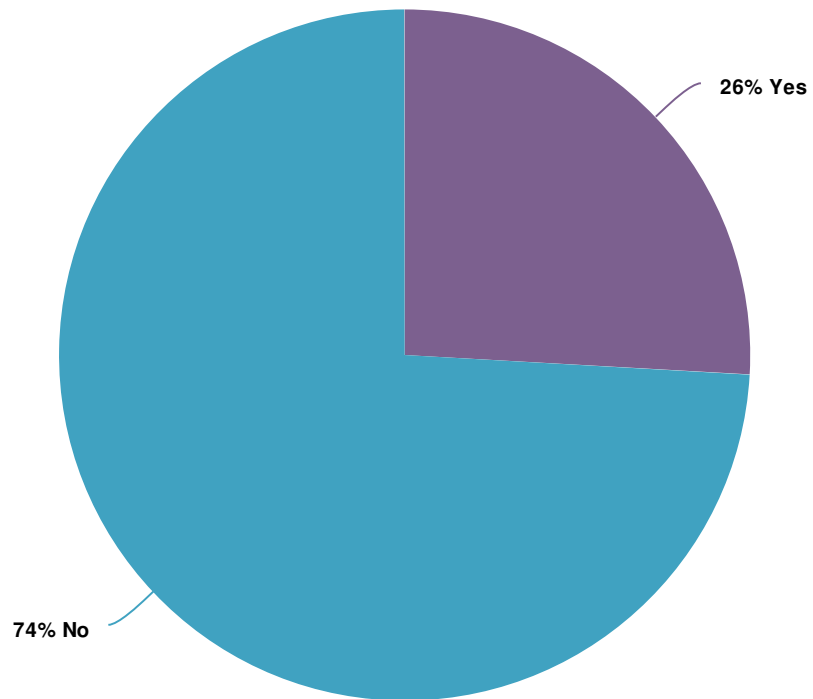

| Value |  | Percent | Responses |
|-------|--|---------|-----------|
| Yes   |  | 25.9%   | 14        |
| No    |  | 74.1%   | 40        |

Totals: 54

22. Have you ever been diagnosed by a doctor as having irritable bowel syndrome?

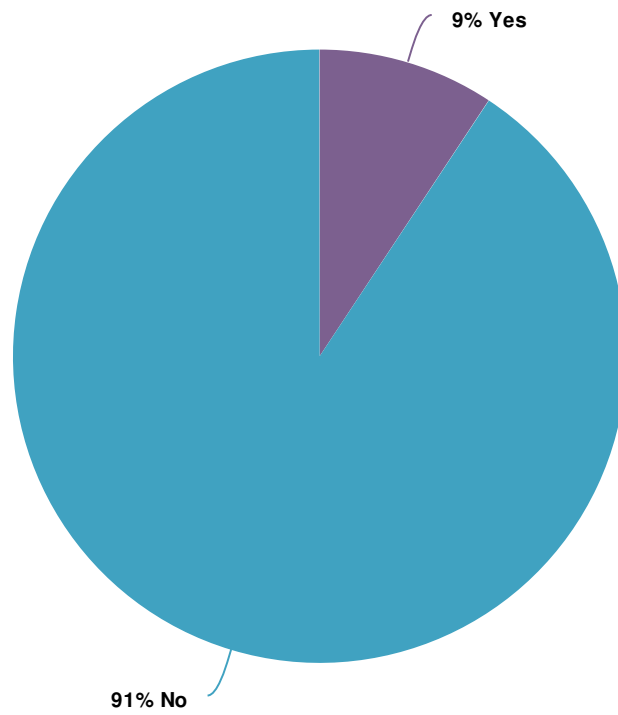

| Value | Percent | Responses |
|-------|---------|-----------|
| Yes   | 9.3%    | 5         |
| No    | 90.7%   | 49        |

Totals: 54

23. Have you ever been diagnosed by a doctor as having gallbladder disease, gallstones or have had your gall bladder removed?

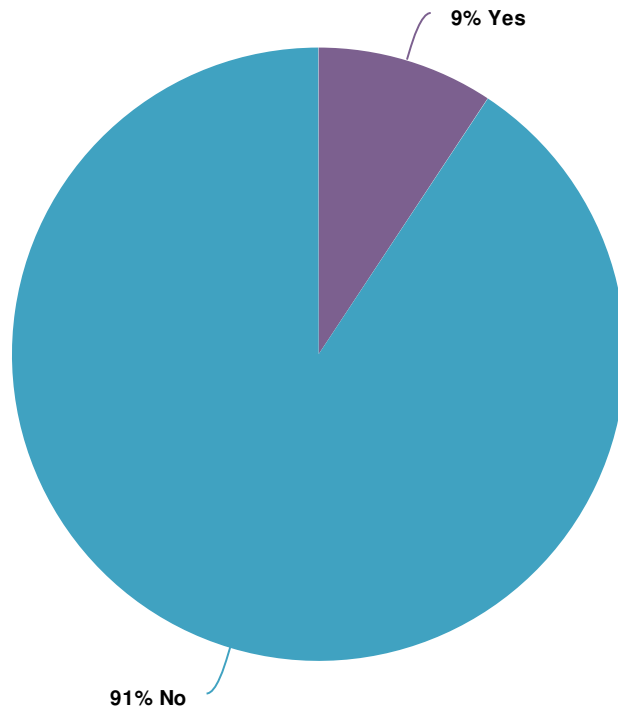

| Value | Percent | Responses |
|-------|---------|-----------|
| Yes   | 9.3%    | 5         |
| No    | 90.7%   | 49        |

Totals: 54



24. Do you suffer from periodic severe nausea and vomiting?



| Value | Percent | Responses         |
|-------|---------|-------------------|
| No    | 100.0%  | 54                |
|       |         | <b>Totals: 54</b> |

25. For how long?

**No data:** No responses found for this question.

26. How often does it occur?

No data to display

27. Are your nausea symptoms worse:

No data to display

28. Have you been medically evaluated for this?

No data to display

29. If so, were you hospitalized for nausea?

No data to display

30. What were the results or diagnosis from the evaluation?

**No data:** No responses found for this question.

31. Do you suffer from periodic severe abdominal pain?

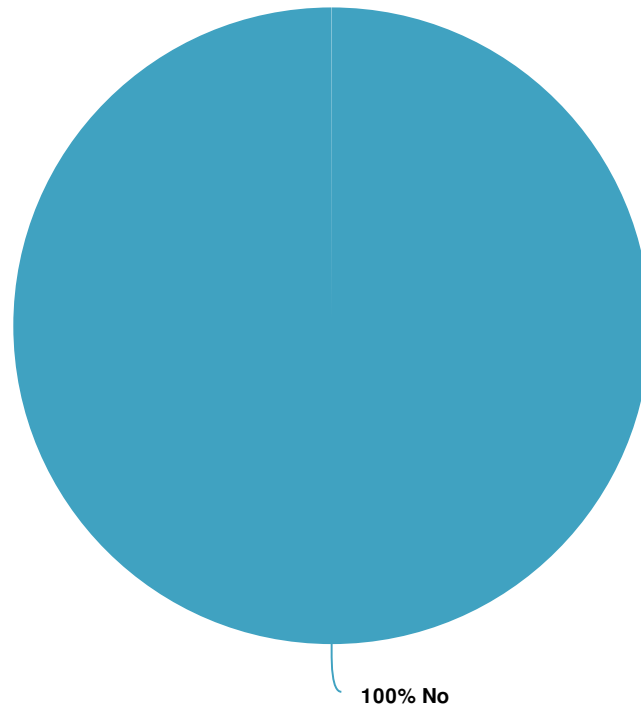

| Value             | Percent | Responses |
|-------------------|---------|-----------|
| No                | 100.0%  | 54        |
| <b>Totals: 54</b> |         |           |



## 32. For how long?

**No data:** No responses found for this question.

33. How often does it occur?

No data to display

34. Have you been medically evaluated for this?

No data to display

35. If so, were you hospitalized for abdominal pain?

No data to display

36. What were the results or diagnosis from the evaluation?

**No data:** No responses found for this question.

37. If you have suffered severe nausea, vomiting or abdominal pain, was the condition improved after cessation of cannabis usage for a long period of time?

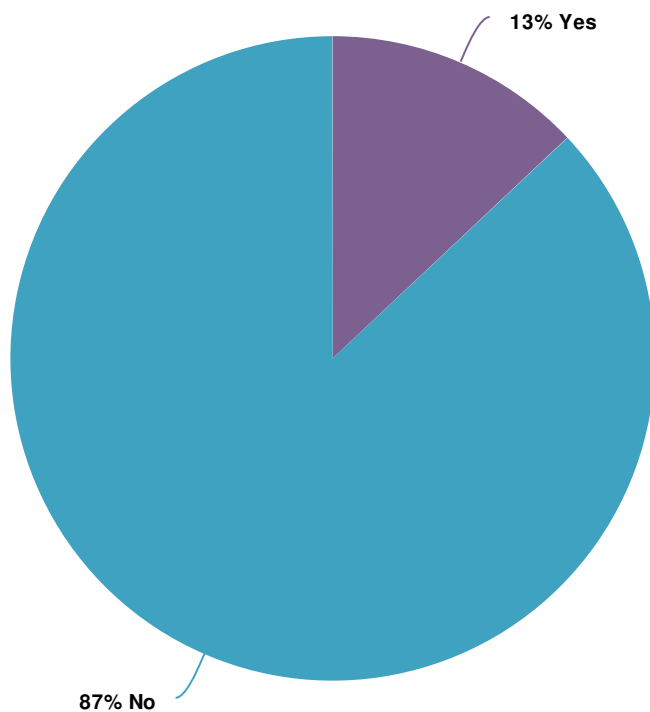

| Value |  | Percent | Responses |
|-------|--|---------|-----------|
| Yes   |  | 13.0%   | 7         |
| No    |  | 87.0%   | 47        |

Totals: 54

38. If you have suffered severe nausea, vomiting or abdominal pain, was the condition improved by taking hot baths or showers?

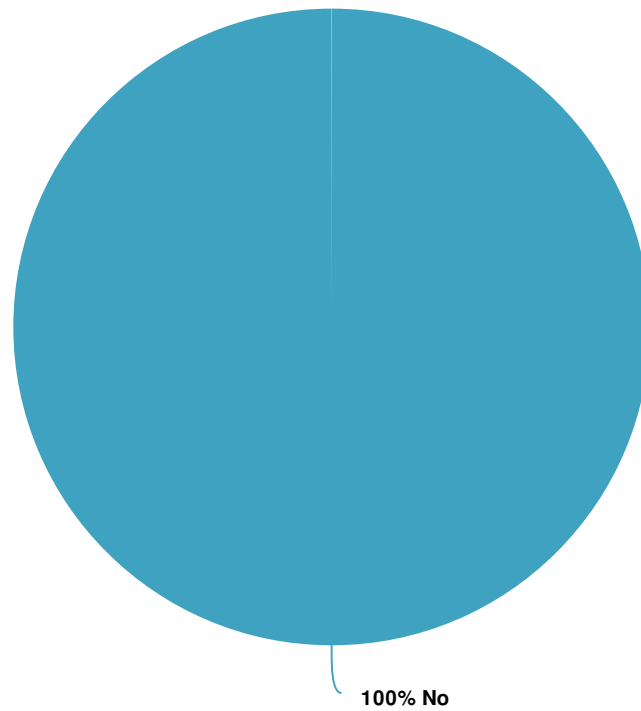

| Value | Percent | Responses         |
|-------|---------|-------------------|
| No    | 100.0%  | 54                |
|       |         | <b>Totals: 54</b> |

39. Have you ever been diagnosed as having the cannabinoid hyperemesis syndrome?

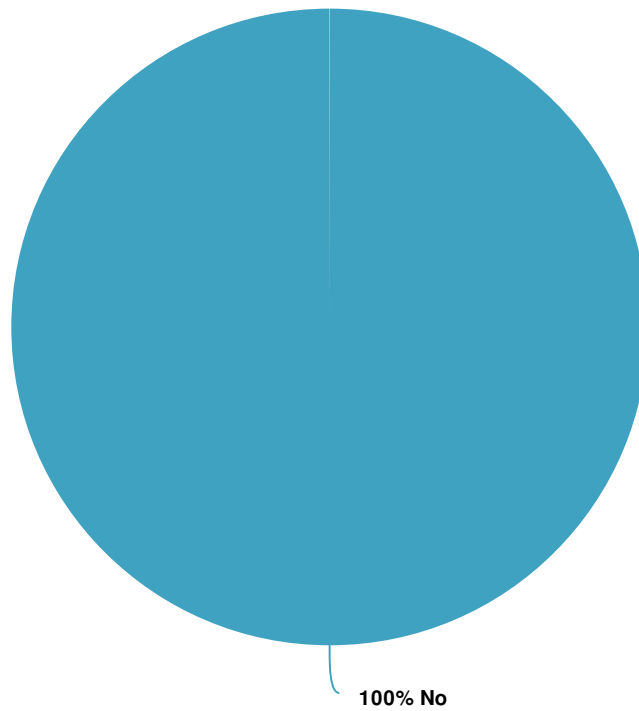

| Value | Percent | Responses         |
|-------|---------|-------------------|
| No    | 100.0%  | 54                |
|       |         | <b>Totals: 54</b> |



40. If yes, how long did you have symptoms before diagnosis?

No data to display

41. Estimate how much money your medical bills cost to evaluate your condition:

**No data:** No responses found for this question.

42. What attempted treatments have you received (check as many as apply)?

Percent

No data to display

---

43. What were the results of your treatment (what helped, what did not)?

**No data:** No responses found for this question.

44. How long did episodes last?

No data to display

45. Did the condition improve after cessation of cannabis usage?

No data to display

46. After how long?

**No data:** No responses found for this question.

47. After a period of abstinence from cannabis, did you resume its usage?

No data to display



48. If yes, what happened upon resumption?

**No data:** No responses found for this question.

49. How long was it before symptoms returned?

No data to display

50. Before symptoms returned, had you increased your cannabis intake (developed tolerance)?

No data to display

51. If you resumed, did you try substituting CBD-predominant cannabis?

No data to display

52. Have you tried other forms of cannabis for this?

No data to display

53. What was the result of use of these other forms of cannabis?

**No data:** No responses found for this question.

54. Do you have an opinion as to the cause of cannabinoid hyperemesis syndrome?

No data to display
